# Supplementary material for: NHC Hg(ii) and Pd(ii) complexes based on 1,8-dihydroxy-9,10-anthraquinone: synthesis, structure and catalysis
Source: Royal Society of Chemistry journal article supplement (doi:10.1039/c8nj02029a), 2018-01-01
Supplement: c8nj02029a1.pdf [file c8nj02029a1.pdf]

**Electronic Supplementary Material (ESI) for New Journal of Chemistry**

**Supplementary Information**

**NHC Hg(II) and Pd(II) complexes based on 1,8-dihydroxy-9,10-anthraquinone:**

**Synthesis, structure and catalysis**

Zhi-Xiang Zhao,<sup>a,b</sup> Ze-Liang Hu,<sup>a,b</sup> Shao-Cong Yu<sup>a,b</sup> and Qing-Xiang Liu<sup>\*a,b</sup>

<sup>a</sup>*Key Laboratory of Inorganic-Organic Hybrid Functional Materials Chemistry (Tianjin Normal University), Ministry of Education, College of Chemistry, Tianjin Normal University, Tianjin 300387, China*

<sup>b</sup>*Tianjin Key Laboratory of Structure and Performance for Functional Molecules, College of Chemistry, Tianjin Normal University, Tianjin 300387, China.*

\*Corresponding Author.

*E-mail address: tjnulqx@163.com*

**Table of Contents:**

1. CCDC numbers for complexes **1-3**.
2. The data of dihedral angles, slip angles between O(2) and anthraquinone plane, and the bond distances of O(2)-Metal, hydrogen bonds and the distances of  $\pi$ - $\pi$  interactions in complexes **1-3** (Table S1-Table S4).
3. The <sup>1</sup>H NMR spectra and <sup>13</sup>C NMR spectra for all intermediates, precursors **L<sup>1</sup>H<sub>2</sub>(PF<sub>6</sub>)<sub>2</sub>-L<sup>3</sup>H<sub>2</sub>(PF<sub>6</sub>)<sub>2</sub>**, and complexes **1-3** (Fig. S1-Fig. S18).
4. The data of <sup>1</sup>H NMR and <sup>13</sup>C NMR spectra for all coupling products in Suzuki-Miyaura reactions.
5. The Fig.s of <sup>1</sup>H NMR and <sup>13</sup>C NMR spectra for all coupling products in Suzuki-Miyaura reactions (Fig. S19-Fig. S48).

### 1. CCDC numbers for complexes 1-3.

CCDC 1851636, 1813374 and 1813375 contains the supplementary crystallographic data for complexes **1-3**. These data can be obtained free of charge via <http://www.ccdc.cam.ac.uk/conts/retrieving.html>, or from the Cambridge Crystallographic Data Centre, 12 Union Road, Cambridge, CB2 1EZ, UK; fax: (+44) 1223-336-033; or e-mail: [deposit@ccdc.cam.ac.uk](mailto:deposit@ccdc.cam.ac.uk).

### 2. The data of dihedral angles, slip angles between O(2) and anthraquinone plane, and the bond distances of O(2)-Metal and hydrogen bonds in complexes 1-3.

**Table S1.** In the same ligand of **1-3**, the dihedral angles ( $^{\circ}$ ) between anthraquinone plane and twoazole rings (A), and the dihedral angles ( $^{\circ}$ ) between twoazole rings in the same NHC-M-NHC units (B).

| Complexes | A               | B       |
|-----------|-----------------|---------|
| <b>1</b>  | 10.8(2)         | 19.7(6) |
| <b>2</b>  | 6.3(7), 25.2(3) | 30.1(8) |
| <b>3</b>  | 2.5(2), 64.3(9) | 63.9(4) |

**Table S2.** The slip angles between O(2) and anthraquinone plane, and the bond distances of O(2)-Metal for **2** and **3**.

| Complexes | slip angles ( $^{\circ}$ ) | O(2)-Metal ( $\text{\AA}$ ) |
|-----------|----------------------------|-----------------------------|
| <b>2</b>  | 17.1(5)                    | 3.085(2)                    |
| <b>3</b>  | 23.2(5)                    | 2.837(5)                    |

**Table S3.** H-Bonding Geometry ( $\text{\AA}$ ,  $^{\circ}$ ) for **1-3**

|          | D-H $\cdots$ A        | D-H      | H $\cdots$ A | D $\cdots$ A | D-H $\cdots$ A |
|----------|-----------------------|----------|--------------|--------------|----------------|
| <b>1</b> | C4-H4 $\cdots$ N3     | 0.950(0) | 2.377(5)     | 3.318(8)     | 170.8(2)       |
|          | C4'-H4' $\cdots$ N3'  | 0.950(0) | 2.377(5)     | 3.318(8)     | 170.8(2)       |
|          | C5-H5 $\cdots$ Br1    | 0.950(0) | 2.923(8)     | 3.709(1)     | 140.8(2)       |
|          | C5'-H5' $\cdots$ Br1' | 0.950(0) | 2.923(8)     | 3.709(1)     | 140.8(2)       |

|   |                 |          |          |          |          |
|---|-----------------|----------|----------|----------|----------|
| 2 | C31-H31A...F5   | 0.970(0) | 2.677(7) | 3.568(6) | 152.8(9) |
|   | C46'-H46'...F3  | 0.930(0) | 2.483(7) | 3.333(8) | 152.0(3) |
|   | C5-H5...F6'     | 0.930(0) | 2.576(3) | 3.411(2) | 149.6(1) |
| 3 | C22-H22...F4    | 0.950(0) | 2.493(5) | 3.219(8) | 133.2(5) |
|   | C22'-H22'...F4' | 0.950(0) | 2.493(5) | 3.219(8) | 133.2(5) |
|   | C24-H24A...F3   | 0.990(0) | 2.443(5) | 3.368(0) | 155.2(2) |
|   | C24-H24B...F3'  | 0.990(0) | 2.443(5) | 3.368(0) | 155.2(2) |
|   | C4-H4...F6      | 0.950(0) | 2.211(6) | 3.138(5) | 164.8(7) |
|   | C15-H15...F4    | 0.950(0) | 2.656(3) | 3.278(3) | 123.5(4) |

Symmetry code: ii:  $-x, -1 + y, -0.5 - z$ ; iii:  $-0.5 + x, -0.5 - y, -1.5 + z$ ; iv:  $-x, -y, -z$ ; v:  $x, -1 + y, -1 + z$  for **1**; i:  $-1 + x, 1 + y, z$ ; ii:  $x, 1 + y, z$  for **2**; ii:  $-0.5 + x, -0.5 + y, z$ ; iii:  $1.5 - x, -0.5 + y, 0.5 - z$ ; iv:  $-0.5 + x, 0.5 + y, -1 + z$ ; v:  $1.5 - x, 0.5 + y, 0.5 - z$ ; vi:  $-0.5 + x, -0.5 + y, -1 + z$  for **3**.

**Table S4.** Distances (Å) of  $\pi$ - $\pi$  interactions for **2**

| Complex | face-to-face                               | center-to-center                           |
|---------|--------------------------------------------|--------------------------------------------|
| 2       | 3.659(2) (benzimidazole)                   | 3.676(2) (benzimidazole)                   |
|         | 3.504(2) (benzimidazole and anthraquinone) | 4.021(2) (benzimidazole and anthraquinone) |
| 3       | 3.329(5) (anthraquinone and imidazole)     | 3.528(6) (anthraquinone and imidazole)     |

### 3. The $^1\text{H}$ NMR spectra and $^{13}\text{C}$ NMR spectra for all intermediates, precursors $\text{L}^1\text{H}_2(\text{PF}_6)_2$ - $\text{L}^3\text{H}_2(\text{PF}_6)_2$ , and complexes 1-3.

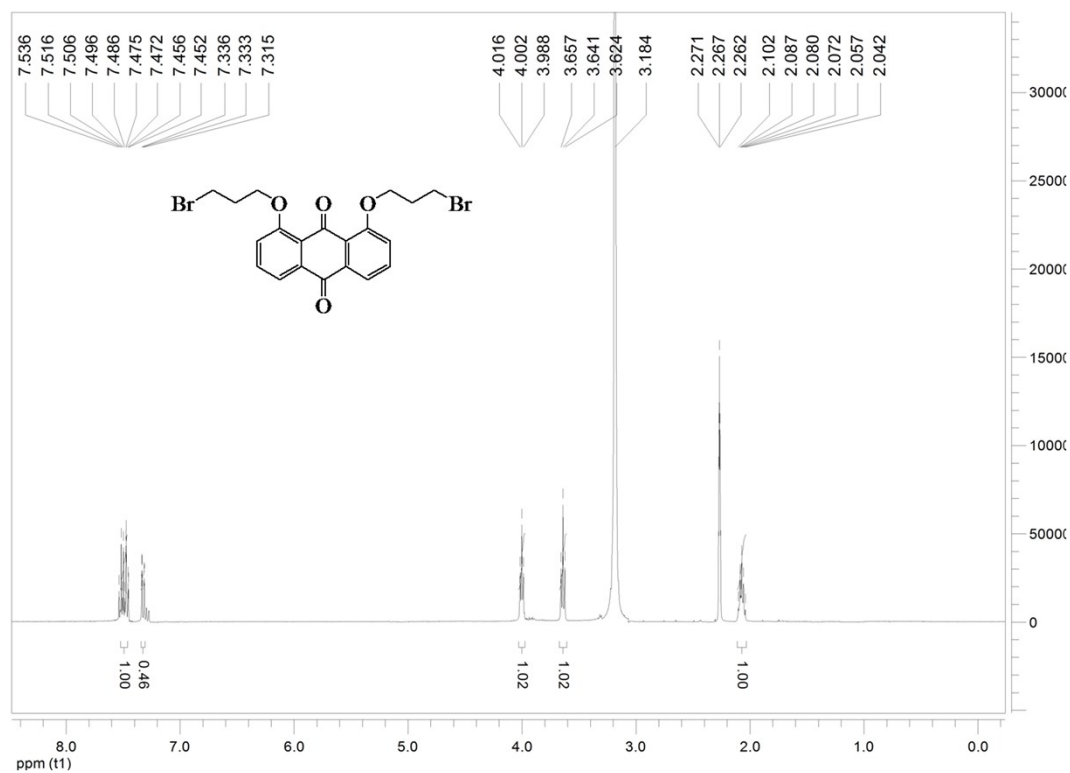

**Fig. S1** The  $^1\text{H}$  NMR (400 MHz,  $\text{DMSO-}d_6$ ) spectra of 1,8-bis(3'-bromopropoxy)anthraquinone.

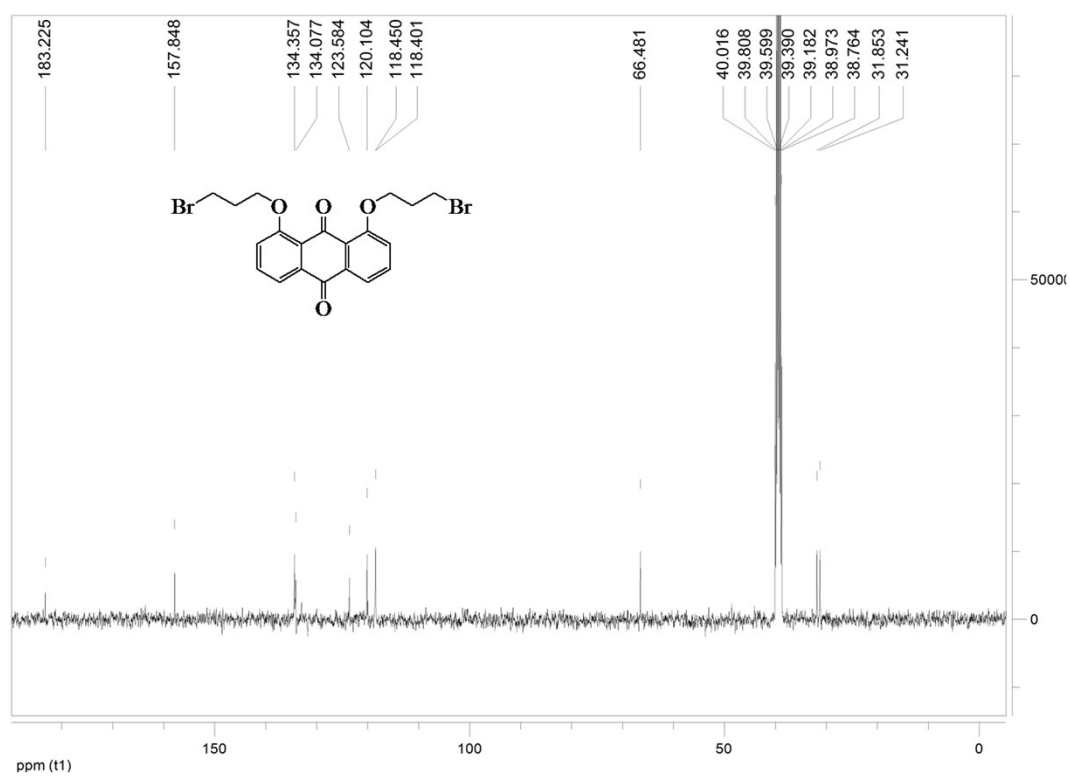

**Fig. S2** The  $^{13}\text{C}$  NMR (100 MHz,  $\text{DMSO-}d_6$ ) spectra of 1,8-bis(3'-bromopropoxy)anthraquinone.

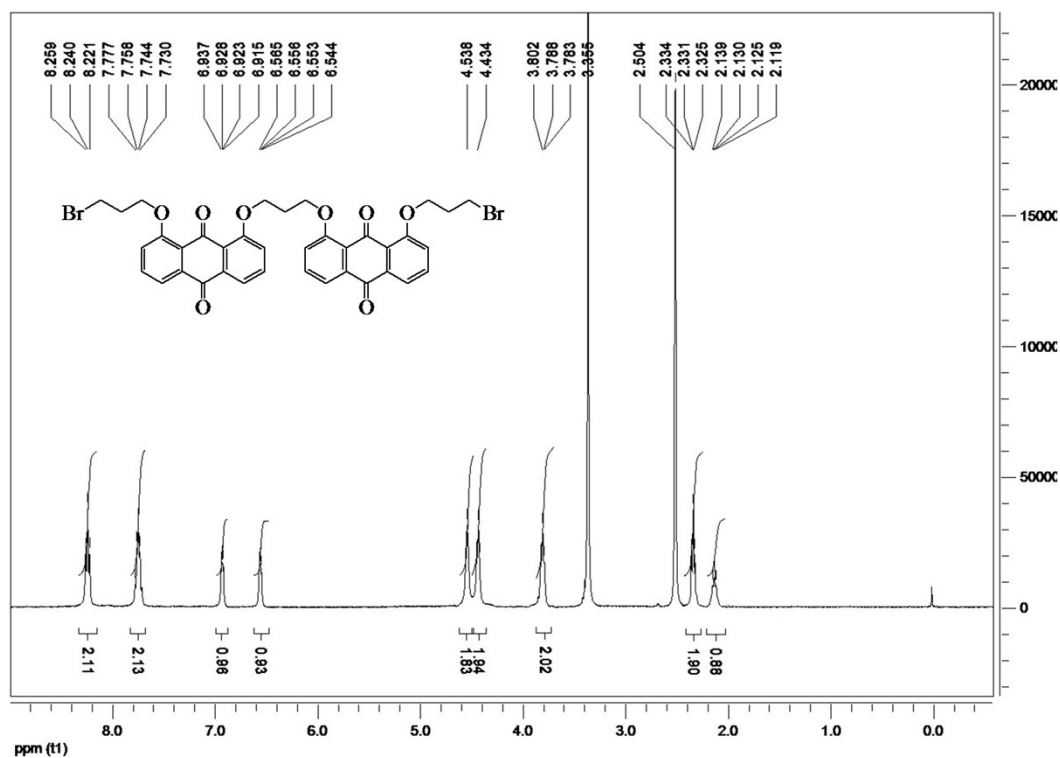

**Fig. S3** The  $^1\text{H}$  NMR (400 MHz,  $\text{DMSO-}d_6$ ) spectra of 1,3-bis[8'-(3''-bromopropoxy)anthraquinon-1-yloxy]propane.

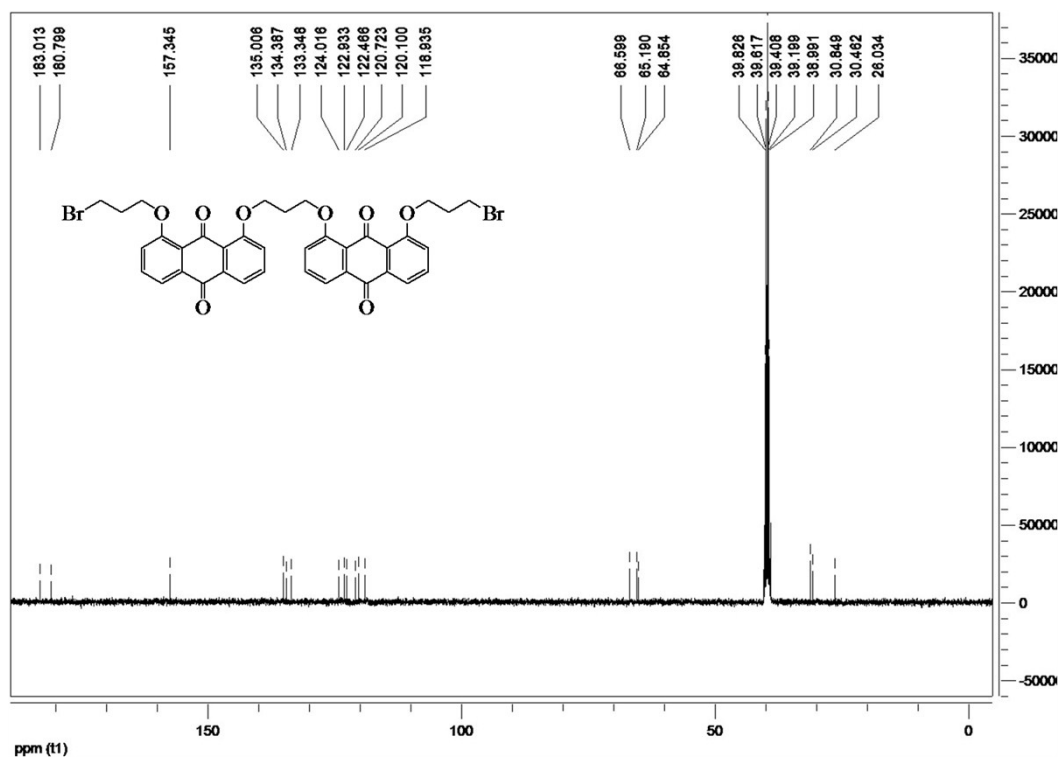

**Fig. S4** The  $^{13}\text{C}$  NMR (100 MHz,  $\text{DMSO-}d_6$ ) spectra of 1,3-bis[8'-(3''-bromopropoxy)anthraquinon-1-yloxy]propane.

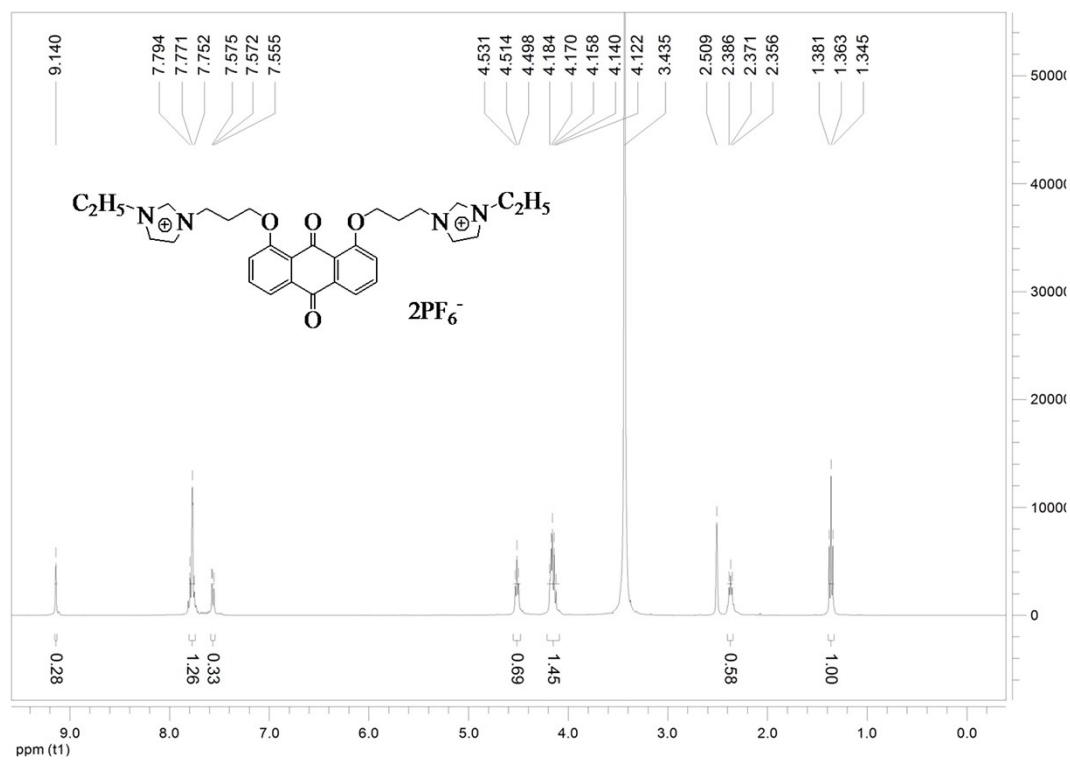

Fig. S5 The  $^1H$  NMR (400 MHz,  $DMSO-d_6$ ) spectra of  $L^1H_2(PF_6)_2$ .

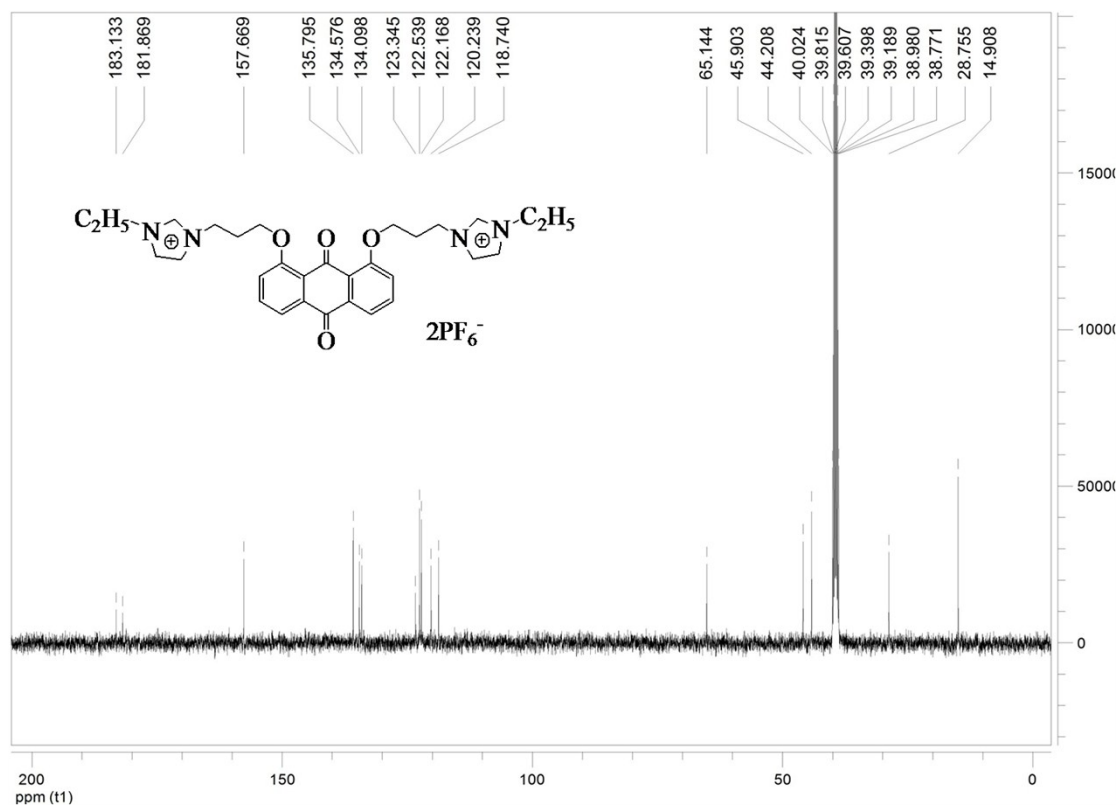

Fig. S6 The  $^{13}C$  NMR (100 MHz,  $DMSO-d_6$ ) spectra of  $L^1H_2(PF_6)_2$ .

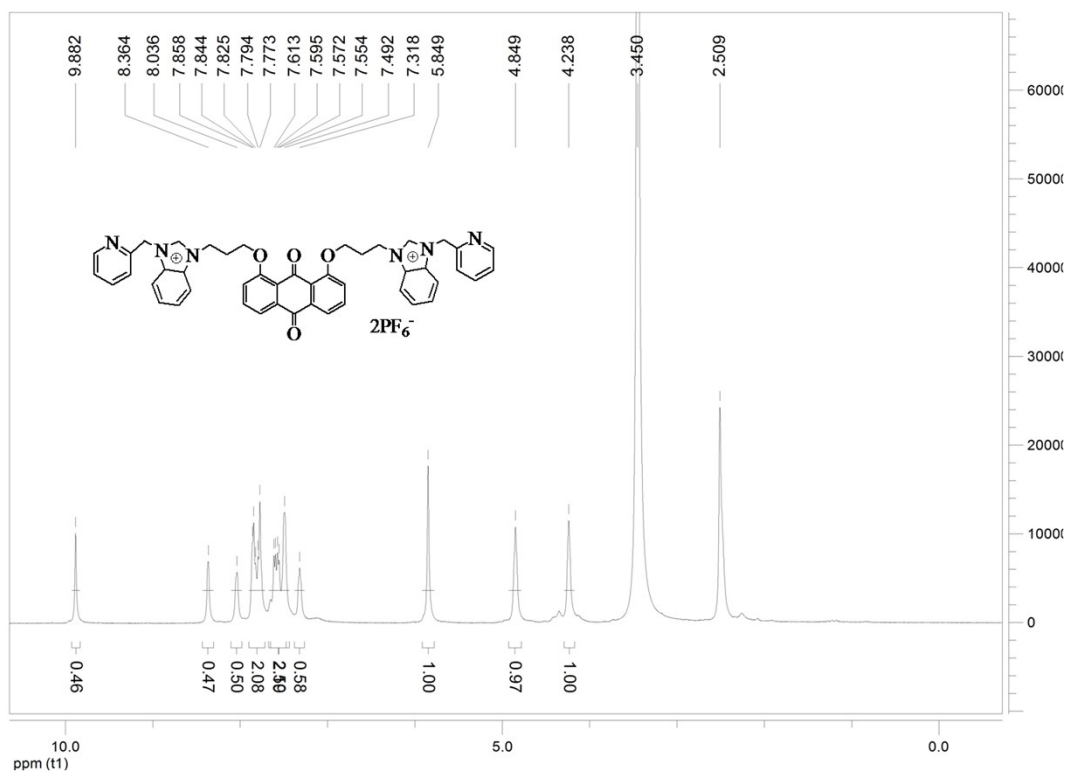

**Fig. S7** The  $^1\text{H}$  NMR (400 MHz,  $\text{DMSO-}d_6$ ) spectra of  $\text{L}^2\text{H}_2(\text{PF}_6)_2$ .

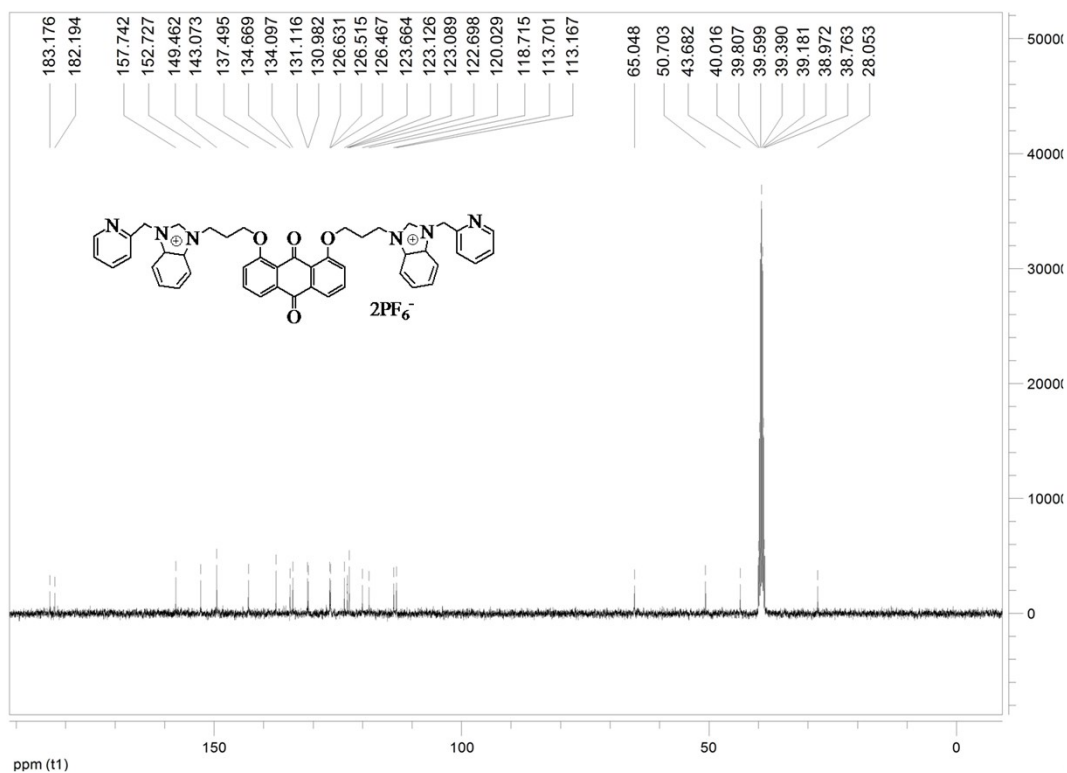

**Fig. S8** The  $^{13}\text{C}$  NMR (100 MHz,  $\text{DMSO-}d_6$ ) spectra of  $\text{L}^2\text{H}_2(\text{PF}_6)_2$ .

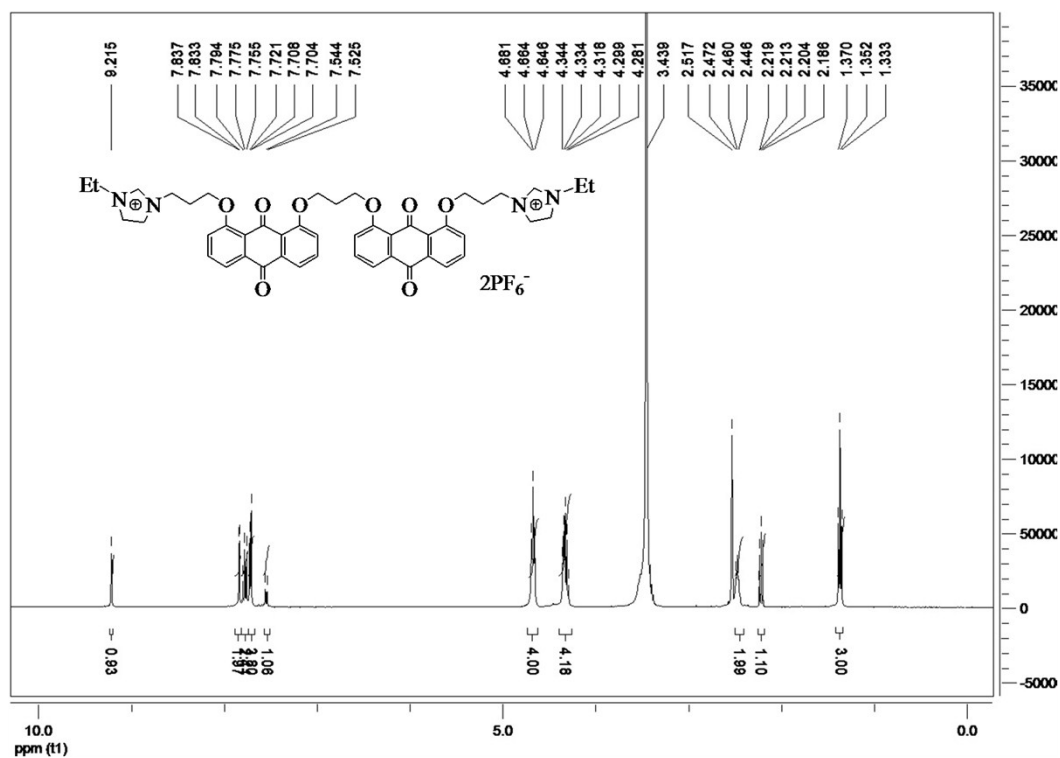

Fig. S9 The  $^1H$  NMR (400 MHz,  $DMSO-d_6$ ) spectra of  $L^3H_2(PF_6)_2$ .

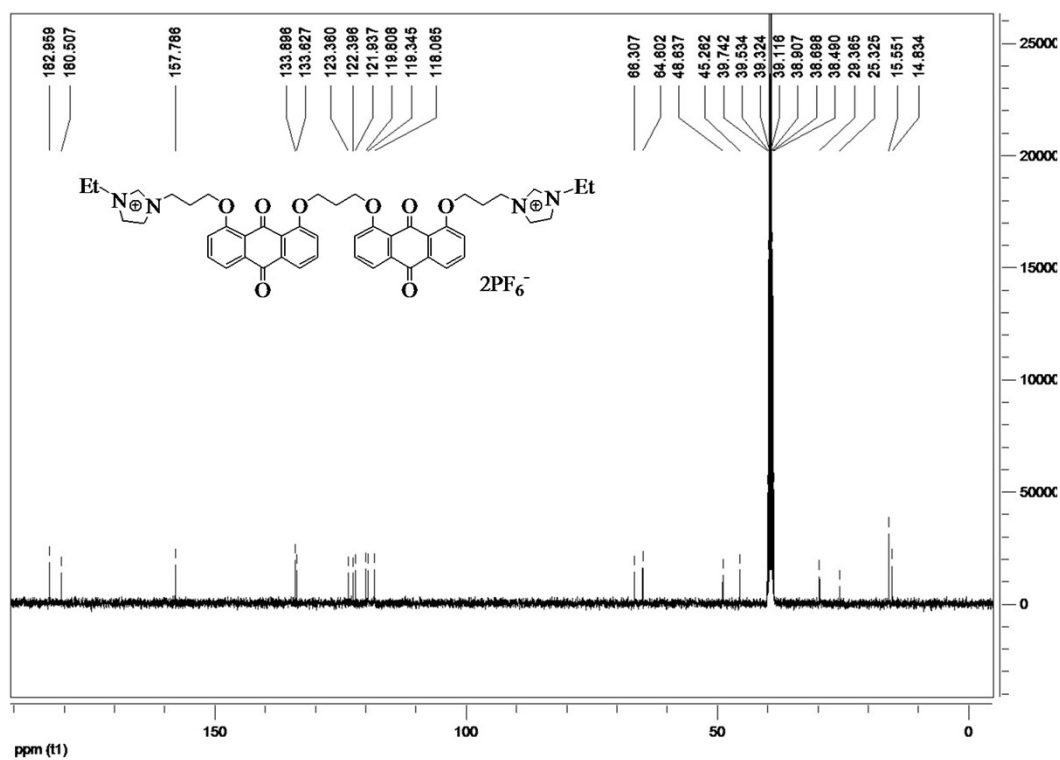

Fig. S10 The  $^{13}C$  NMR (100 MHz,  $DMSO-d_6$ ) spectra of  $L^3H_2(PF_6)_2$ .



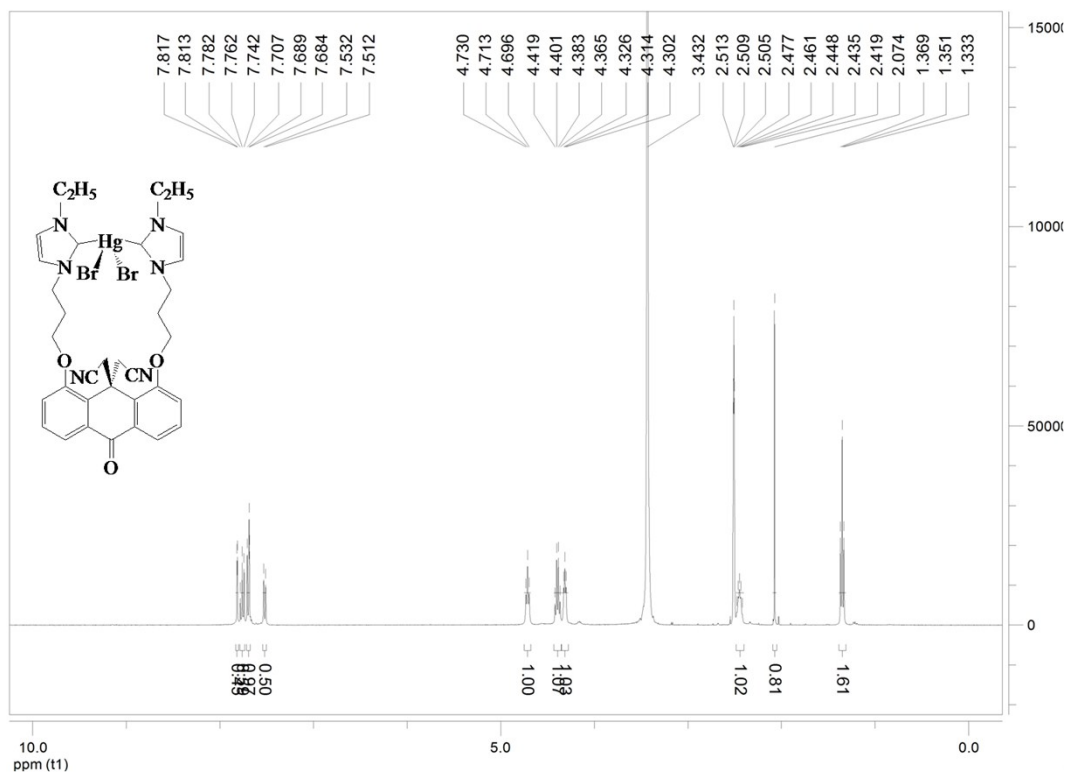

Fig. S11 The  $^1\text{H}$  NMR (400 MHz,  $\text{DMSO-}d_6$ ) spectra of 1.

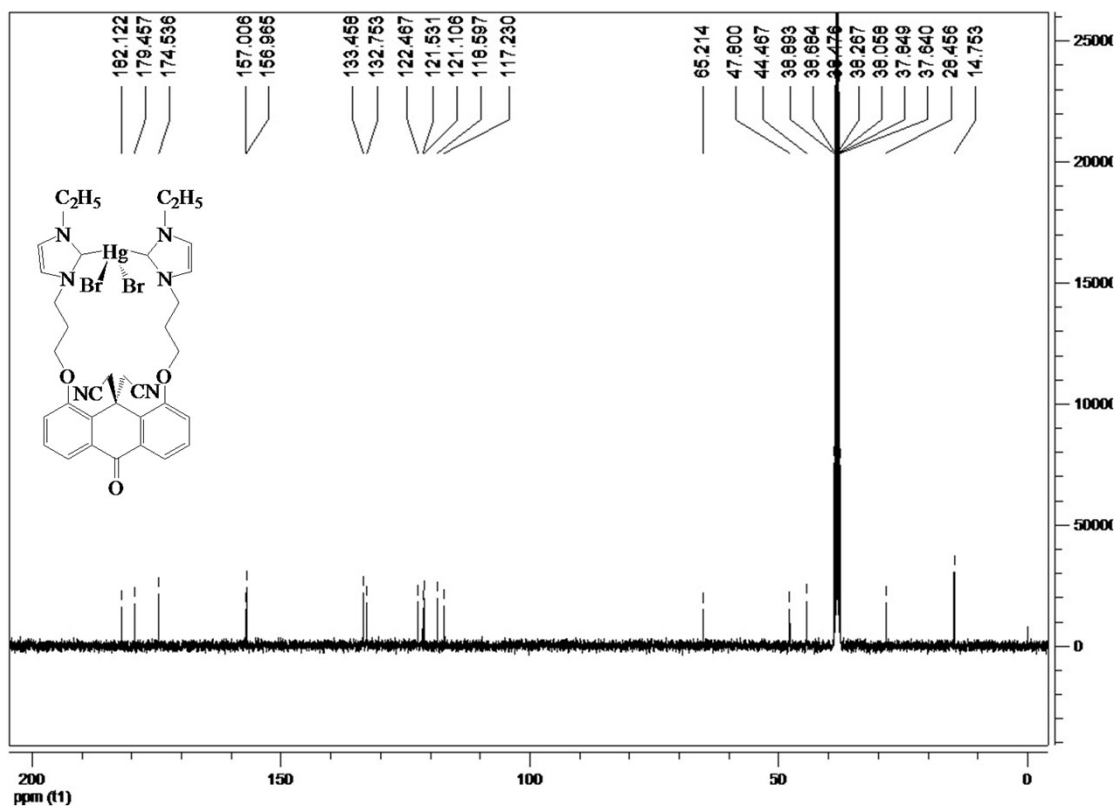

Fig. S12 The  $^{13}\text{C}$  NMR (100 MHz,  $\text{DMSO-}d_6$ ) spectra of 1.

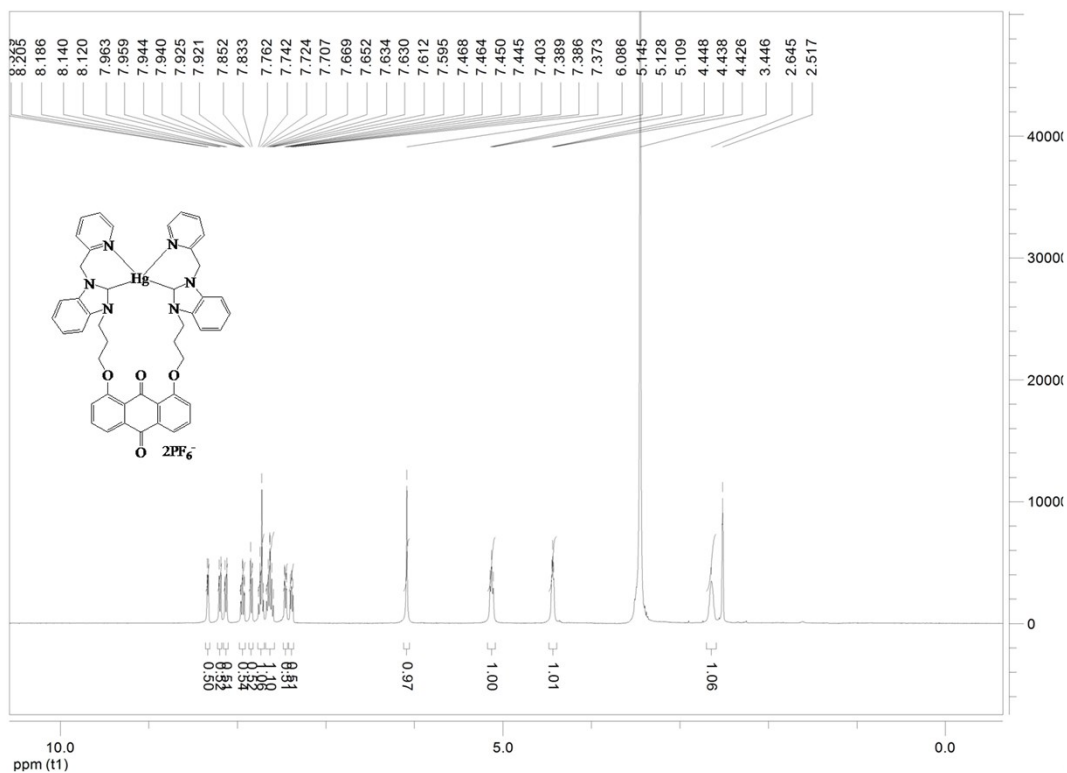

**Fig. S13** The  $^1H$  NMR (400 MHz,  $DMSO-d_6$ ) spectra of **2**.

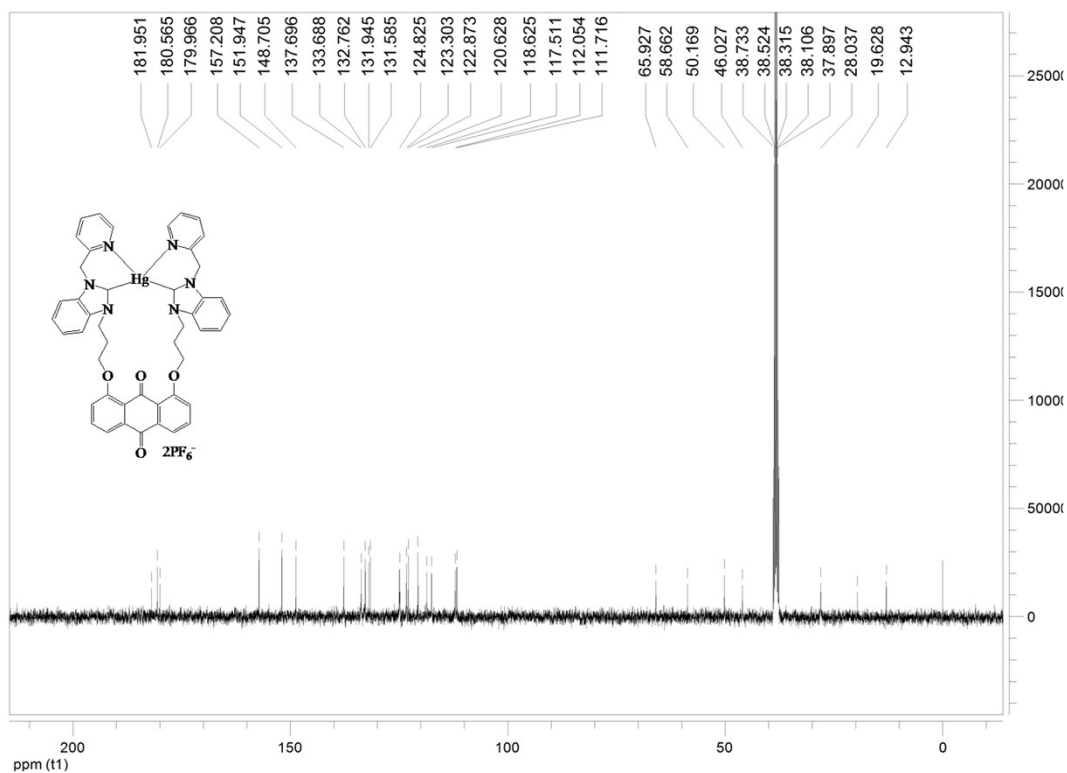

**Fig. S14** The  $^{13}C$  NMR (100 MHz,  $DMSO-d_6$ ) spectra of **2**.

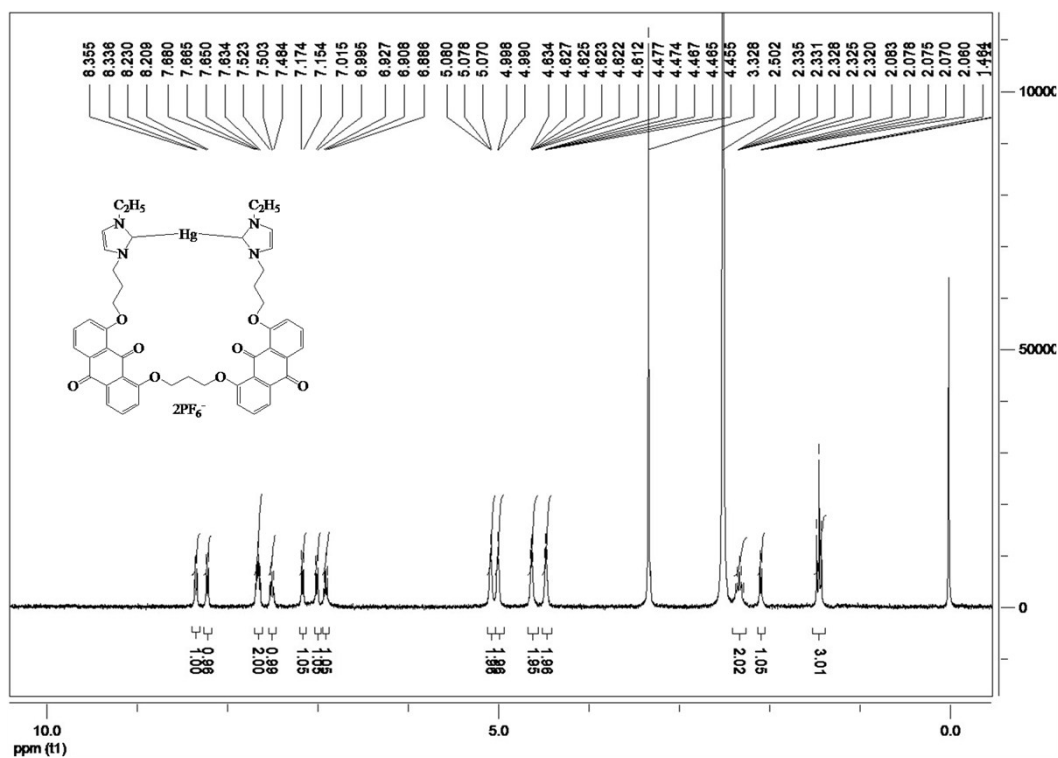

Fig. S15 The  $^1H$  NMR (400 MHz,  $DMSO-d_6$ ) spectra of **3**.

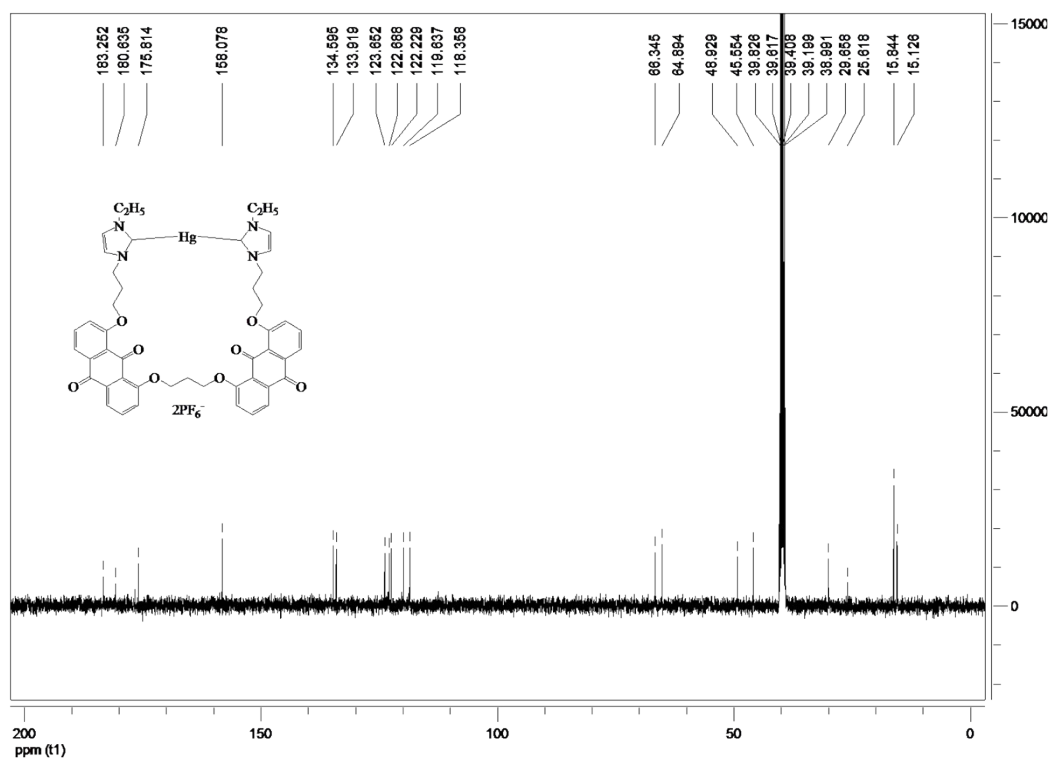

Fig. S16 The  $^{13}C$  NMR (100 MHz,  $DMSO-d_6$ ) spectra of **3**.

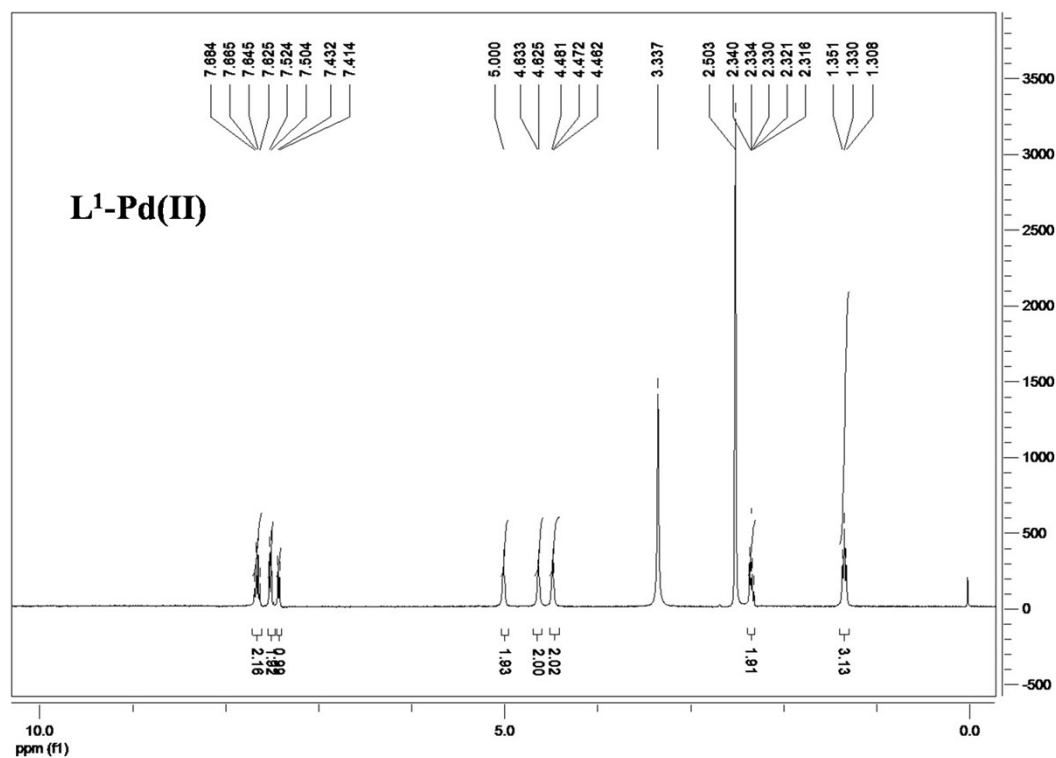

Fig. S17 The <sup>1</sup>H NMR (400 MHz, DMSO-*d*<sub>6</sub>) spectra of L<sup>1</sup>-Pd(II).

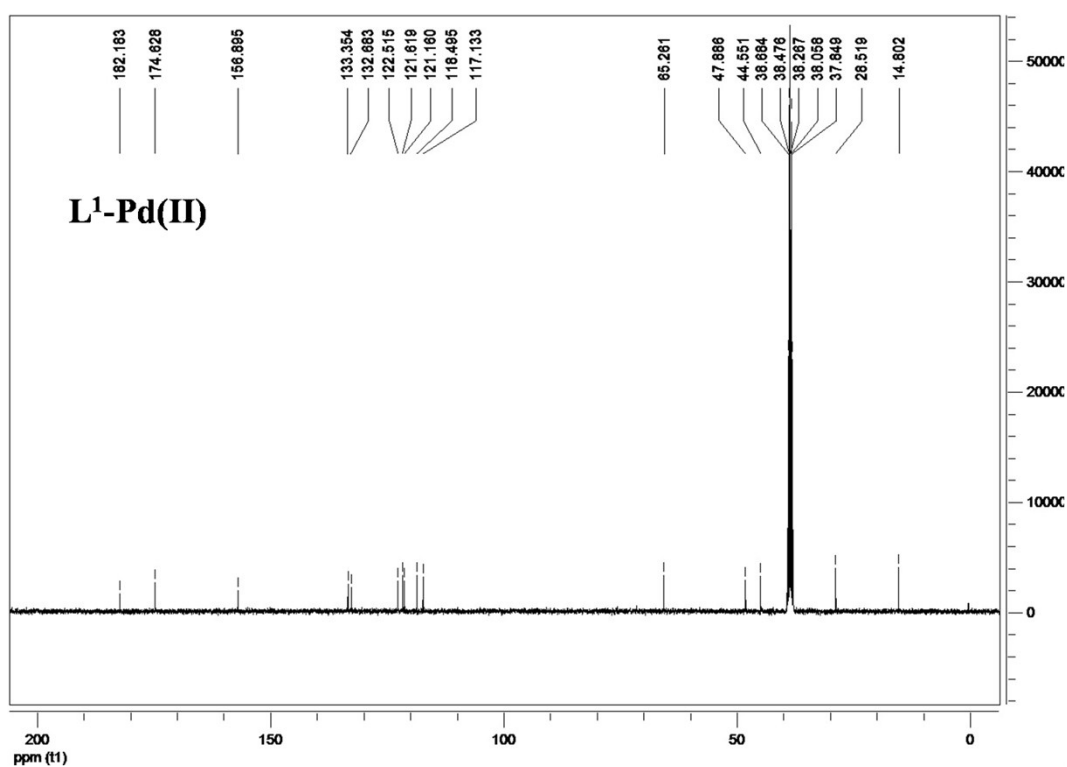

Fig. S18 The <sup>13</sup>C NMR (100 MHz, DMSO-*d*<sub>6</sub>) spectra of L<sup>1</sup>-Pd(II).

4. The data of <sup>1</sup>H NMR and <sup>13</sup>C NMR spectra for all coupling products in

### Suzuki-Miyaura reactions.

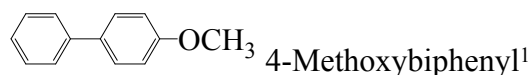

<sup>1</sup>H NMR (400 MHz, CDCl<sub>3</sub>): δ 3.84 (s, 3H, CH<sub>3</sub>), 6.98 (d, *J* = 8.4 Hz, 2H, ArH), 7.29 (t, *J* = 7.4 Hz, 1H, ArH), 7.41 (t, *J* = 7.6 Hz, 2H, ArH), 7.55 (t, *J* = 8.4 Hz, 4H, ArH).

<sup>13</sup>C NMR (100 MHz, CDCl<sub>3</sub>): δ 55.3 (CH<sub>3</sub>), 114.2 (ArC), 126.7 (ArC), 128.1 (ArC), 128.7 (ArC), 133.7 (ArC), 140.8 (ArC), 159.1 (ArC).

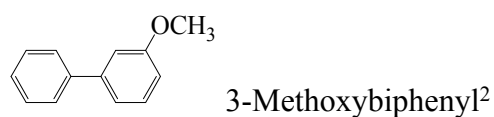

<sup>1</sup>H NMR (400 MHz, CDCl<sub>3</sub>): δ 3.83 (s, 3H, CH<sub>3</sub>), 6.89 (d, *J* = 8.0 Hz, 1H, ArH), 7.12 (d, *J* = 1.6 Hz, 1H, ArH), 7.18 (d, *J* = 7.6 Hz, 1H, ArH), 7.35 (m, 2H, ArH), 7.41 (t, *J* = 7.6 Hz, 2H, ArH), 7.58 (d, *J* = 7.6 Hz, 2H, ArH). <sup>13</sup>C NMR (100 MHz, CDCl<sub>3</sub>): δ 55.2 (CH<sub>3</sub>), 112.6 (ArC), 112.9 (ArC), 119.6 (ArC), 127.1 (ArC), 127.3 (ArC), 128.7 (ArC), 129.7 (ArC), 141.0 (ArC), 142.7 (ArC), 159.9 (ArC).

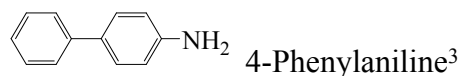

<sup>1</sup>H NMR (400 MHz, CDCl<sub>3</sub>): δ 3.67 (s, 2H, NH<sub>2</sub>), 6.73 (d, *J* = 8.4 Hz, 2H, ArH), 7.25 (d, *J* = 7.2 Hz, 1H, ArH), 7.41 (m, 4H, ArH), 7.53 (d, *J* = 7.2 Hz, 2H, ArH). <sup>13</sup>C NMR (100 MHz, CDCl<sub>3</sub>): δ 115.3 (ArC), 126.2 (ArC), 126.3 (ArC), 127.9 (ArC), 128.6 (ArC), 131.5 (ArC), 141.1 (ArC), 145.8 (ArC).

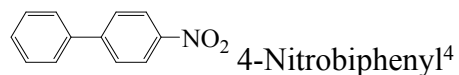

<sup>1</sup>H NMR (400 MHz, CDCl<sub>3</sub>): δ 7.51 (m, 3H, ArH), 7.64 (t, *J* = 4.2 Hz, 2H, ArH), 7.75 (d, *J* = 8.8 Hz, 2H, ArH), 8.31 (d, *J* = 8.8 Hz, 2H, ArH). <sup>13</sup>C NMR (100 MHz, CDCl<sub>3</sub>): δ 124.1 (ArC), 127.3 (ArC), 127.8 (ArC), 128.9 (ArC), 129.1 (ArC), 138.7 (ArC), 147.1 (ArC), 147.6 (ArC).

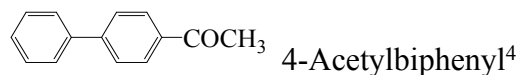

$^1\text{H}$  NMR (400 MHz,  $\text{CDCl}_3$ ):  $\delta$  2.64 (s, 3H,  $\text{CH}_3$ ), 7.40 (t,  $J = 7.2$  Hz, 1H,  $\text{ArH}$ ), 7.47 (t,  $J = 7.6$  Hz, 2H,  $\text{ArH}$ ), 7.62 (d,  $J = 7.2$  Hz, 2H,  $\text{ArH}$ ), 7.70 (d,  $J = 8.4$  Hz, 2H,  $\text{ArH}$ ), 8.04 (d,  $J = 8.4$  Hz, 2H,  $\text{ArH}$ ).  $^{13}\text{C}$  NMR (100 MHz,  $\text{CDCl}_3$ ):  $\delta$  26.6 ( $\text{CH}_3$ ), 127.24 (ArC), 127.28 (ArC), 128.2 (ArC), 128.92 (ArC), 128.96 (ArC), 135.8 (ArC), 139.8 (ArC), 145.8 (ArC), 197.7 (CO).

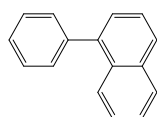

1-Phenylnaphthalene<sup>2</sup>

$^1\text{H}$  NMR (400 MHz,  $\text{CDCl}_3$ ):  $\delta$  7.51 (m, 3H,  $\text{ArH}$ ), 7.62 (m, 6H,  $\text{ArH}$ ), 7.92 (d,  $J = 8.4$  Hz, 1H,  $\text{ArH}$ ), 8.00 (q,  $J = 4.0$  Hz, 2H,  $\text{ArH}$ ).  $^{13}\text{C}$  NMR (100 MHz,  $\text{CDCl}_3$ ):  $\delta$  125.4 (ArC), 125.8 (ArC), 126.0 (ArC), 126.9 (ArC), 127.23 (ArC), 127.29 (ArC), 127.6 (ArC), 128.3 (ArC), 128.8 (ArC), 130.1 (ArC), 131.6 (ArC), 133.8 (ArC), 140.3 (ArC), 140.8 (ArC).

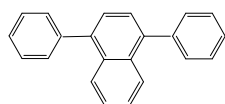

1,4-Diphenylnaphthalene<sup>5</sup>

$^1\text{H}$  NMR (400 MHz,  $\text{CDCl}_3$ ):  $\delta$  7.52 (m, 6H,  $\text{ArH}$ ), 7.60 (m, 8H,  $\text{ArH}$ ), 8.02 (q,  $J = 3.3$  Hz, 2H,  $\text{ArH}$ ).  $^{13}\text{C}$  NMR (100 MHz,  $\text{CDCl}_3$ ):  $\delta$  125.8 (ArC), 126.3 (ArC), 126.4 (ArC), 127.2 (ArC), 128.2 (ArC), 130.0 (ArC), 130.1 (ArC), 131.9 (ArC), 139.8 (ArC), 140.8 (ArC).

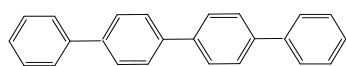

4,4'-Diphenylbiphenyl<sup>6</sup>

$^1\text{H}$  NMR (400 MHz,  $\text{DMSO}-d_6$ ):  $\delta$  7.52 (t,  $J = 7.4$  Hz, 4H,  $\text{ArH}$ ), 7.70 (d,  $J = 4.4$  Hz, 4H,  $\text{ArH}$ ), 7.74 (d,  $J = 7.6$  Hz, 4H,  $\text{ArH}$ ), 7.79 (s, 6H,  $\text{ArH}$ ).  $^{13}\text{C}$  NMR (100 MHz,  $\text{DMSO}-d_6$ ):  $\delta$  126.5 (ArC), 127.0 (ArC), 127.2 (ArC), 127.6 (ArC), 128.6 (ArC), 129.0 (ArC), 131.8 (ArC).

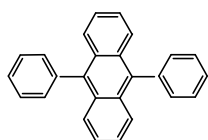

9,10-Diphenylanthracene<sup>7</sup>

<sup>1</sup>H NMR (400 MHz, DMSO-*d*<sub>6</sub>):  $\delta$  7.47 (q,  $J = 5.3$  Hz, 8H, ArH), 7.67 (m, 10H, ArH).

<sup>13</sup>C NMR (100 MHz, DMSO-*d*<sub>6</sub>):  $\delta$  125.4 (ArC), 126.3 (ArC), 128.6 (ArC), 129.1 (ArC), 130.8 (ArC).

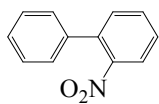

2-Nitrobiphenyl<sup>2</sup>

<sup>1</sup>H NMR (400 MHz, CDCl<sub>3</sub>):  $\delta$  7.33 (q,  $J = 3.2$  Hz, 2H, ArH), 7.50 (m, 5H, ArH),

7.63 (m, 1H, ArH), 7.86 (q,  $J = 3.0$  Hz, 1H, ArH). <sup>13</sup>C NMR (100 MHz, CDCl<sub>3</sub>):  $\delta$  124.0 (ArC), 127.9 (ArC), 128.1 (ArC), 128.2 (ArC), 128.7 (ArC), 131.9 (ArC), 132.2 (ArC), 136.3 (ArC), 137.3 (ArC), 149.3 (ArC).

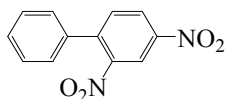

2,4-Dinitrobiphenyl<sup>8</sup>

<sup>1</sup>H NMR (400 MHz, CDCl<sub>3</sub>):  $\delta$  7.38 (q,  $J = 3.2$  Hz, 2H, ArH), 7.52 (t,  $J = 3.2$  Hz, 3H,

ArH), 7.72 (d,  $J = 8.8$  Hz, 1H, ArH), 8.51 (q,  $J = 3.6$  Hz, 1H, ArH), 8.74 (d,  $J = 2.0$

Hz, 1H, ArH). <sup>13</sup>C NMR (100 MHz, CDCl<sub>3</sub>):  $\delta$  119.7 (ArC), 126.4 (ArC), 127.6

(ArC), 129.1 (ArC), 129.5 (ArC), 133.2 (ArC), 135.2 (ArC), 142.2 (ArC), 146.8

(ArC), 149.1 (ArC).

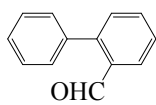

Biphenyl-2-carbaldehyde<sup>4</sup>

<sup>1</sup>H NMR (400 MHz, CDCl<sub>3</sub>):  $\delta$  7.33 (m, 7H, ArH), 7.56 (q,  $J = 2.9$  Hz, 1H, ArH),

7.97 (q,  $J = 3.2$  Hz, 1H, ArH), 10.52 (s, 1H, CHO). <sup>13</sup>C NMR (100 MHz, CDCl<sub>3</sub>):  $\delta$

126.5 (ArC), 127.3 (ArC), 128.0 (ArC), 129.4 (ArC), 129.6 (ArC), 129.7 (ArC), 130.6

(ArC), 133.2 (ArC), 135.1 (ArC), 135.3 (ArC), 189.8 (CHO).

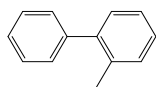

2-Methylbiphenyl<sup>2</sup>

<sup>1</sup>H NMR (400 MHz, CDCl<sub>3</sub>):  $\delta$  2.26 (s, 3H, CH<sub>3</sub>), 7.24 (m, 3H, ArH), 7.33 (m, 3H,

ArH), 7.43 (m, 3H, ArH).  $^{13}\text{C}$  NMR (100 MHz,  $\text{CDCl}_3$ ):  $\delta$  20.5 ( $\text{CH}_3$ ), 125.8 (ArC), 126.8 (ArC), 127.2 (ArC), 127.3 (ArC), 128.1 (ArC), 128.8 (ArC), 129.2 (ArC), 129.8 (ArC), 130.3 (ArC), 135.3 (ArC), 142.0 (ArC).

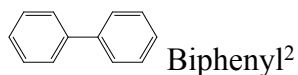

$^1\text{H}$  NMR (400 MHz,  $\text{CDCl}_3$ ):  $\delta$  7.44 (t,  $J = 7.2$  Hz, 2H, ArH), 7.53 (t,  $J = 7.4$  Hz, 4H, ArH), 7.70 (d,  $J = 7.6$  Hz, 4H, ArH).  $^{13}\text{C}$  NMR (100 MHz,  $\text{CDCl}_3$ ):  $\delta$  127.2 (ArC), 127.3 (ArC), 128.8 (ArC), 141.3 (ArC).

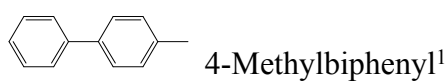

$^1\text{H}$  NMR (400 MHz,  $\text{CDCl}_3$ ):  $\delta$  2.38 (s, 3H,  $\text{CH}_2$ ), 7.24 (d,  $J = 8.0$  Hz, 2H, ArH), 7.30 (t,  $J = 7.4$  Hz, 1H, ArH), 7.40 (t,  $J = 7.6$  Hz, 2H, ArH), 7.47 (d,  $J = 8.0$  Hz, 2H, ArH), 7.55 (d,  $J = 8.4$  Hz, 2H, ArH).  $^{13}\text{C}$  NMR (100 MHz,  $\text{CDCl}_3$ ):  $\delta$  21.1 ( $\text{CH}_3$ ), 127.0 (ArC), 127.2 (ArC), 128.7 (ArC), 129.5 (ArC), 137.0 (ArC), 138.4 (ArC), 141.2 (ArC).

**5. The Figs of  $^1\text{H}$  NMR and  $^{13}\text{C}$  NMR spectra for all coupling products in Suzuki-Miyaura reactions.**

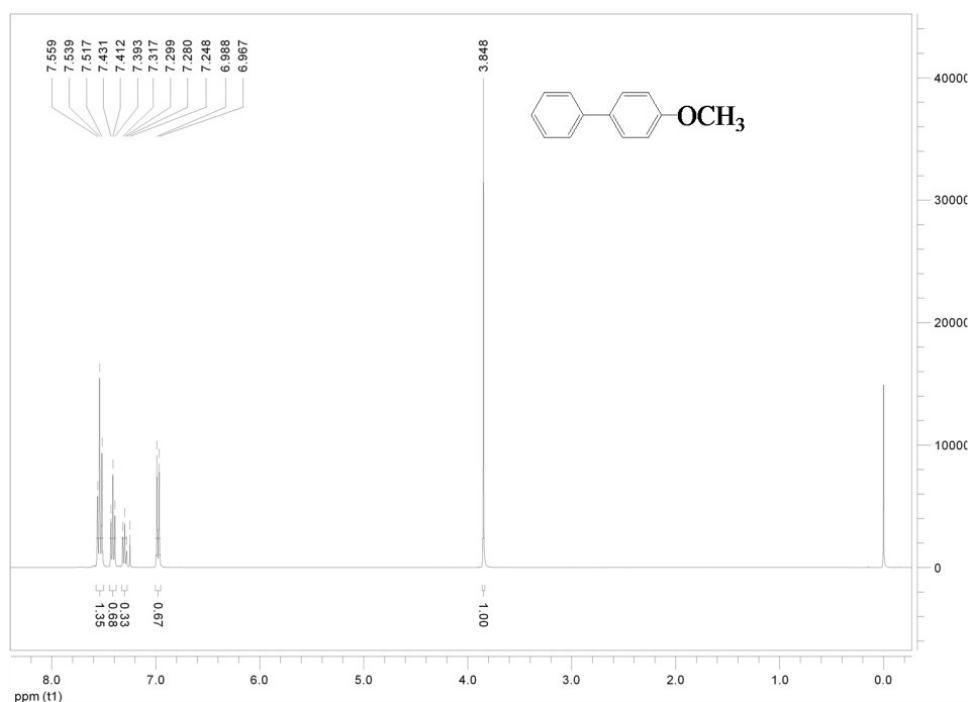



**Fig. S19** The  $^1\text{H}$  NMR (400 MHz,  $\text{CDCl}_3$ ) spectra of 4-methoxybiphenyl.

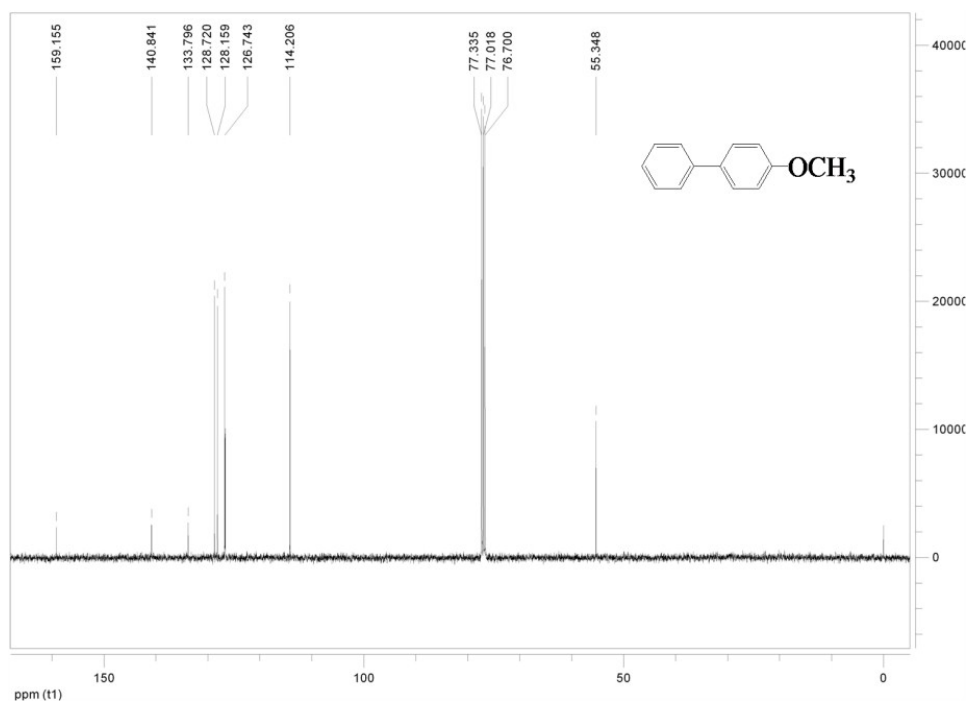

**Fig. S20** The  $^{13}\text{C}$  NMR (100 MHz,  $\text{CDCl}_3$ ) spectra of 4-methoxybiphenyl.

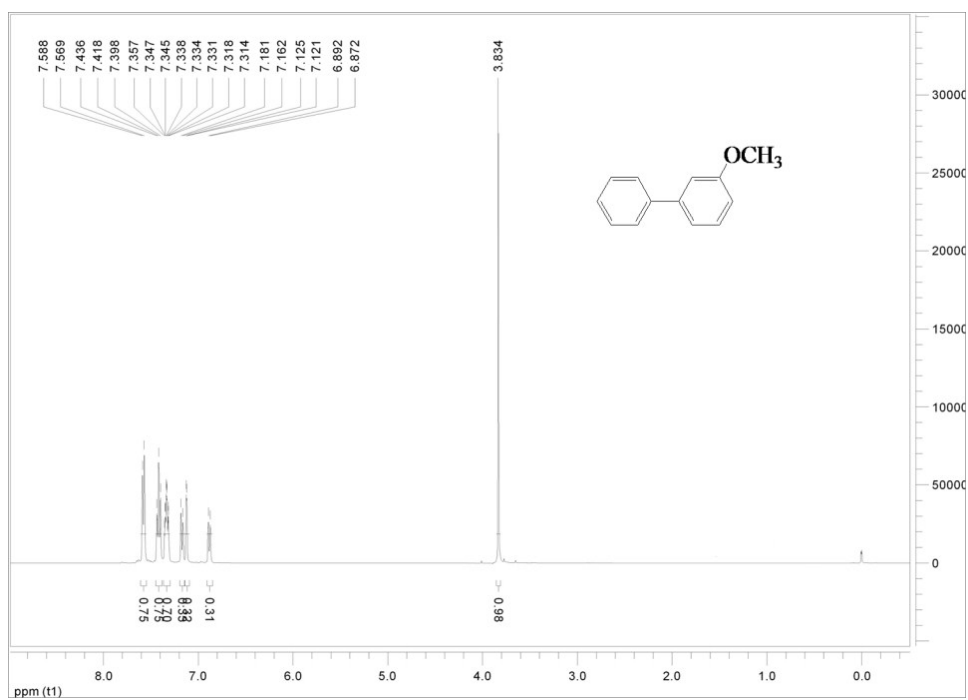

**Fig. S21** The  $^1\text{H}$  NMR (400 MHz,  $\text{CDCl}_3$ ) spectra of 3-methoxybiphenyl.

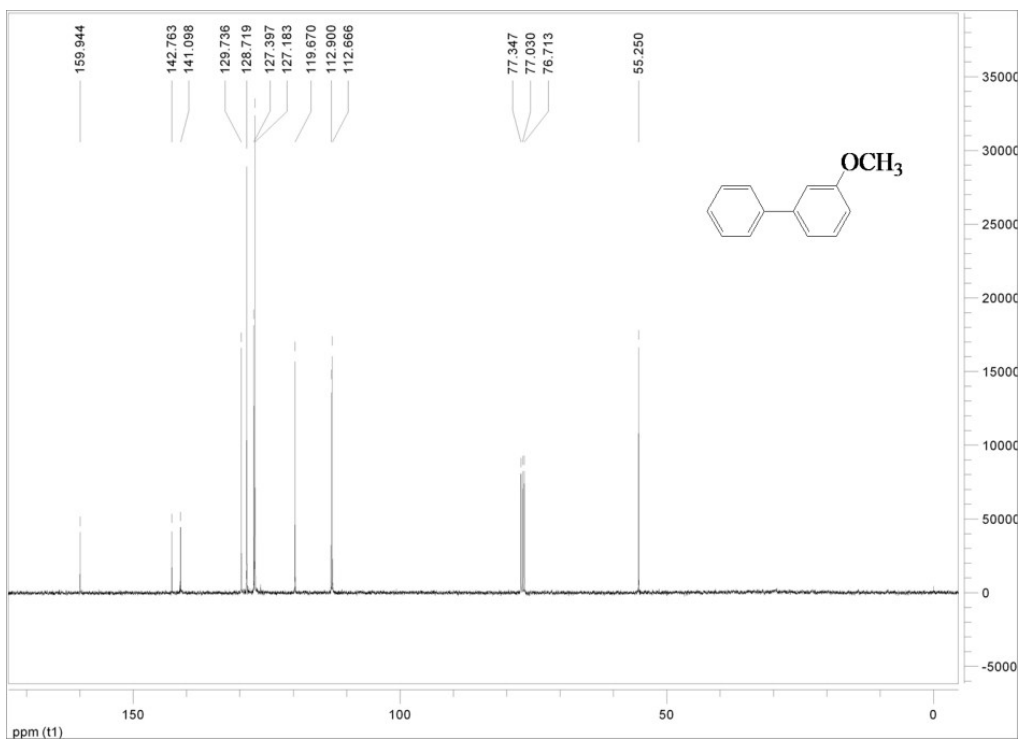

**Fig. S22** The  $^{13}\text{C}$  NMR (100 MHz,  $\text{CDCl}_3$ ) spectra of 3-methoxybiphenyl.

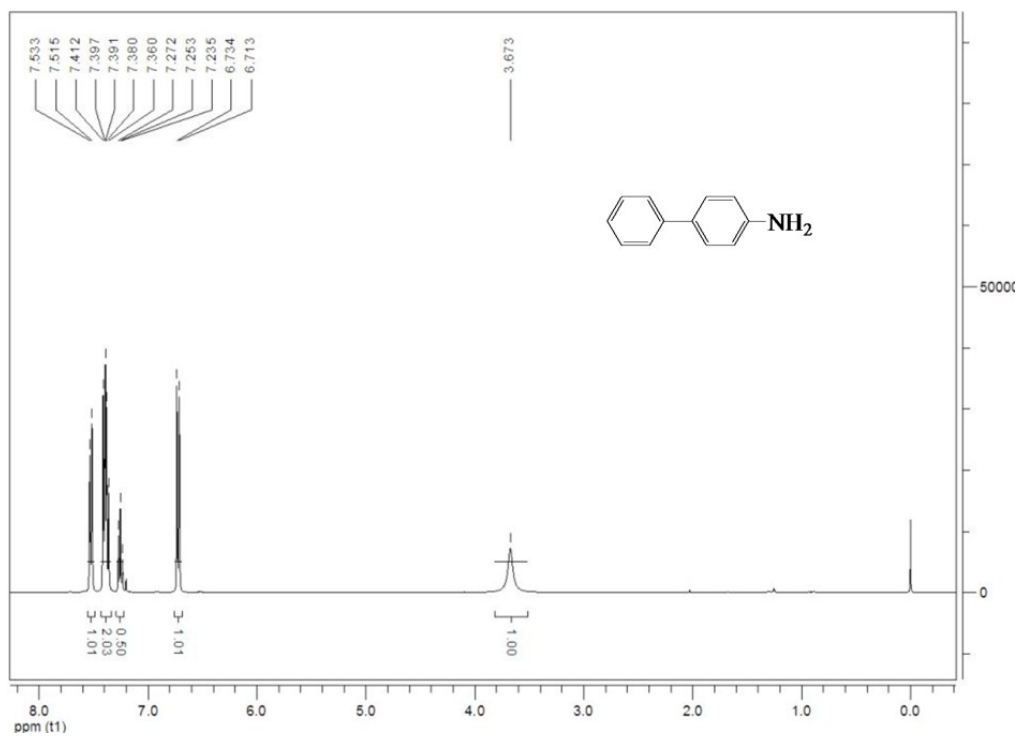

**Fig. S23** The  $^1\text{H}$  NMR (400 MHz,  $\text{CDCl}_3$ ) spectra of 4-phenylaniline.

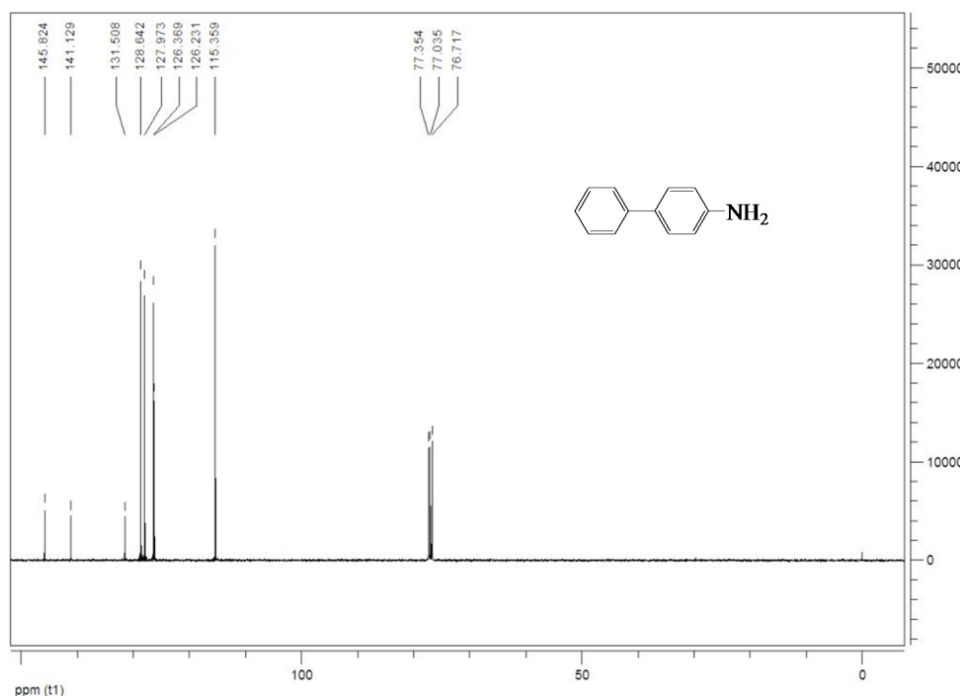

**Fig. S24** The  $^{13}\text{C}$  NMR (100 MHz,  $\text{CDCl}_3$ ) spectra of 4-phenylaniline.

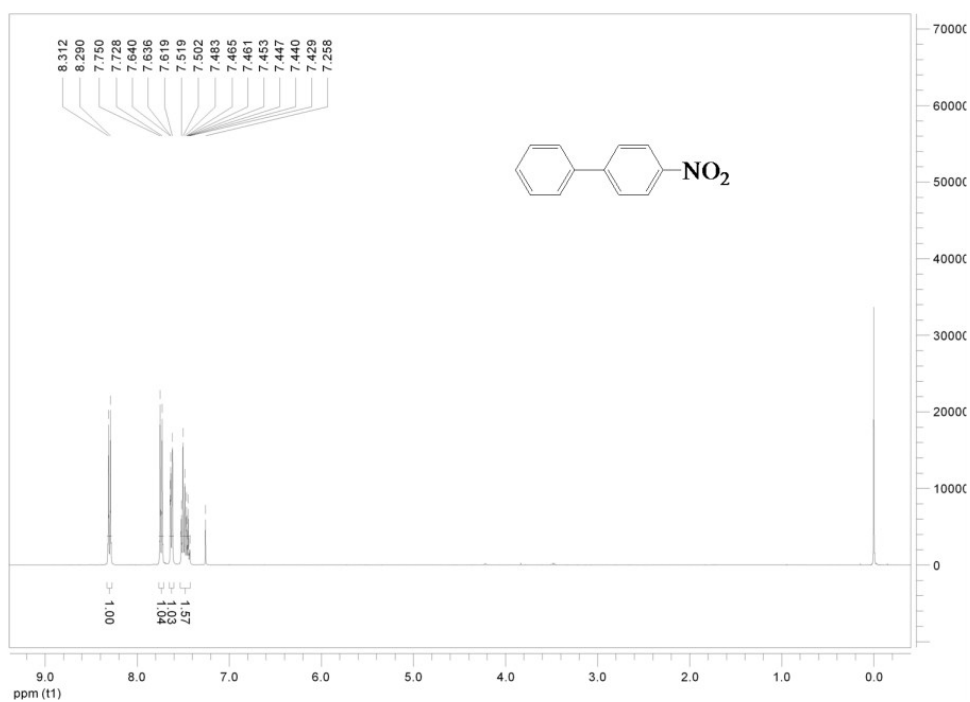

**Fig. S25** The  $^1\text{H}$  NMR (400 MHz,  $\text{CDCl}_3$ ) spectra of 4-nitrobiphenyl.

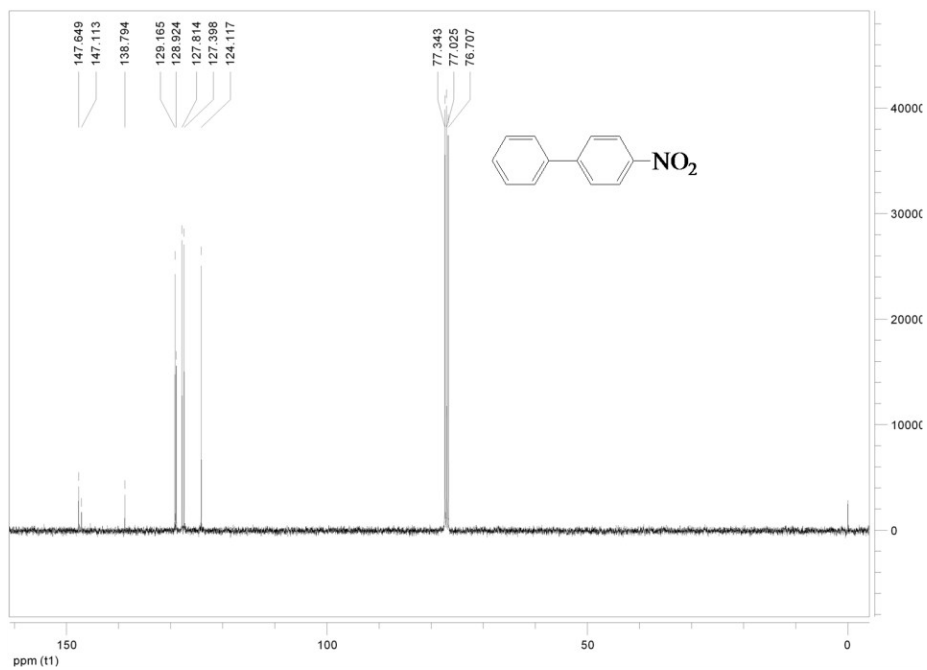

**Fig. S26** The  $^{13}\text{C}$  NMR (100 MHz,  $\text{CDCl}_3$ ) spectra of 4-nitrobiphenyl.

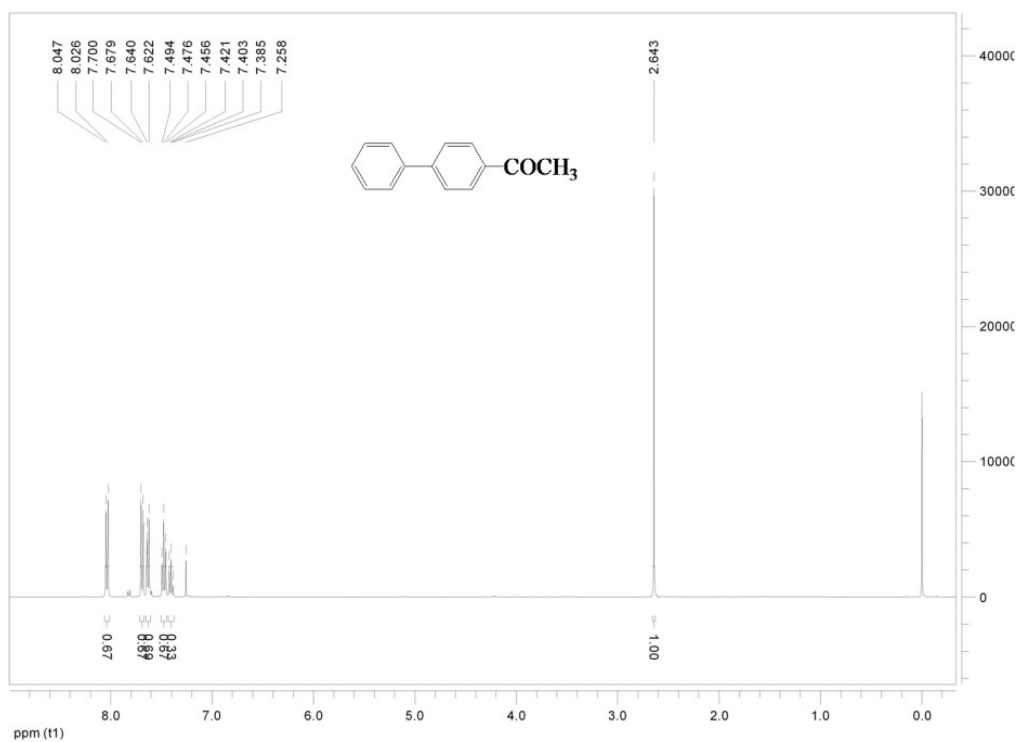

**Fig. S27** The  $^1\text{H}$  NMR (400 MHz,  $\text{CDCl}_3$ ) spectra of 4-acetylbiphenyl.

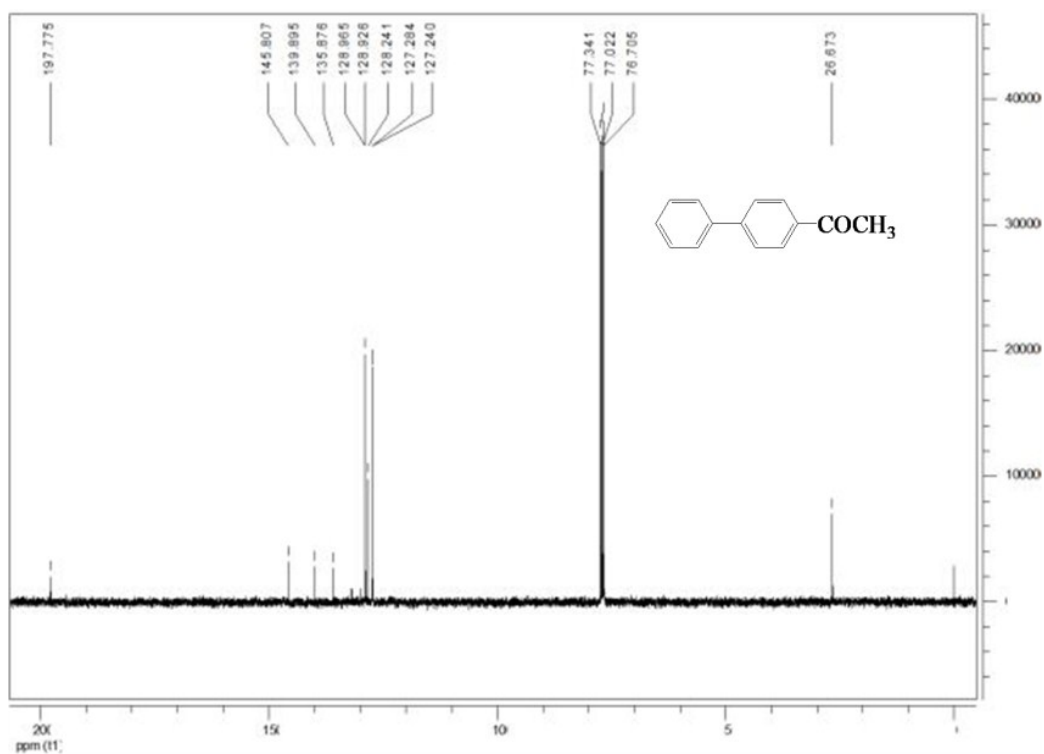

Fig. S28 The  $^{13}\text{C}$  NMR (100 MHz,  $\text{CDCl}_3$ ) spectra of 4-acetylbiphenyl.

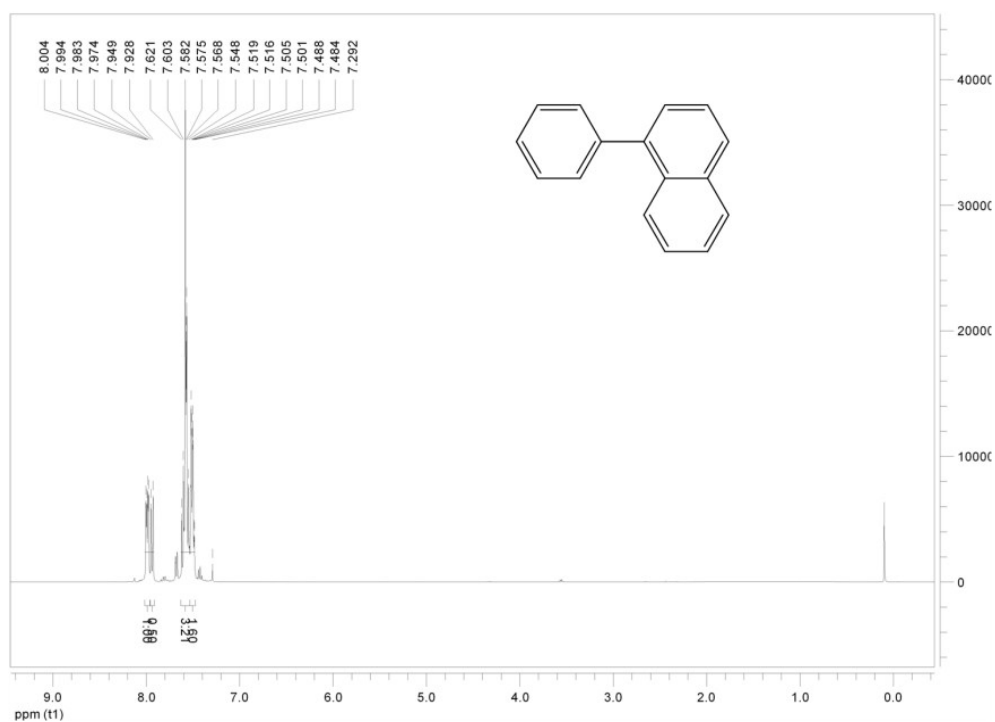

Fig. S29 The  $^1\text{H}$  NMR (400 MHz,  $\text{CDCl}_3$ ) spectra of 1-phenylnaphthalene.

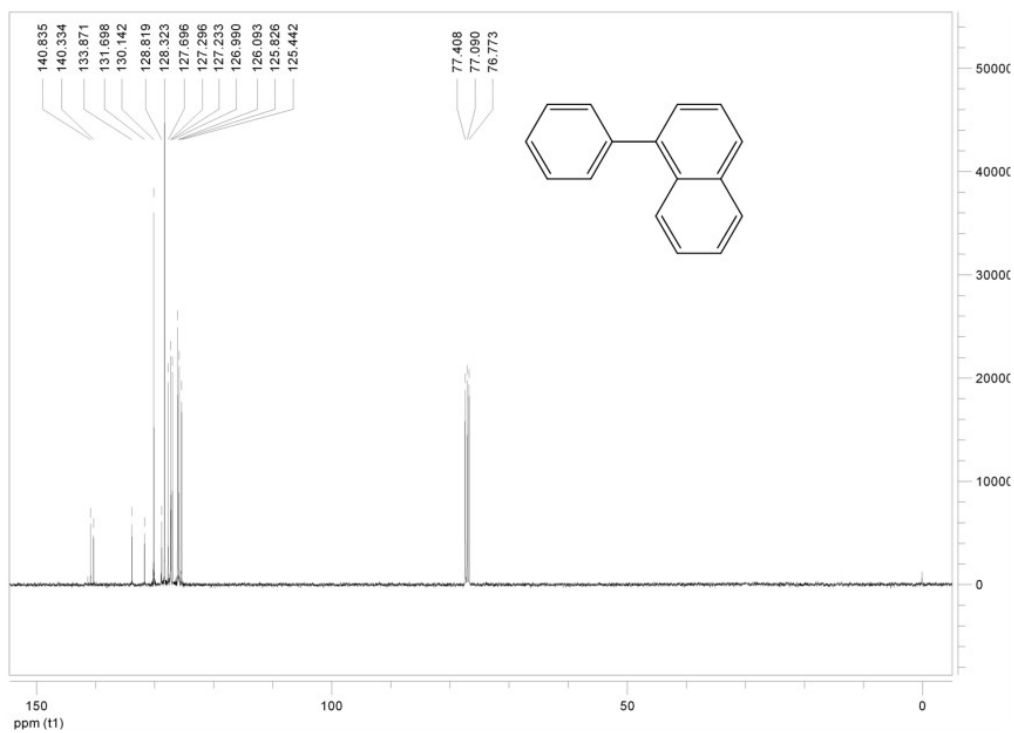

**Fig. S30** The  $^{13}\text{C}$  NMR (100 MHz,  $\text{CDCl}_3$ ) spectra of 1-phenylnaphthalene.

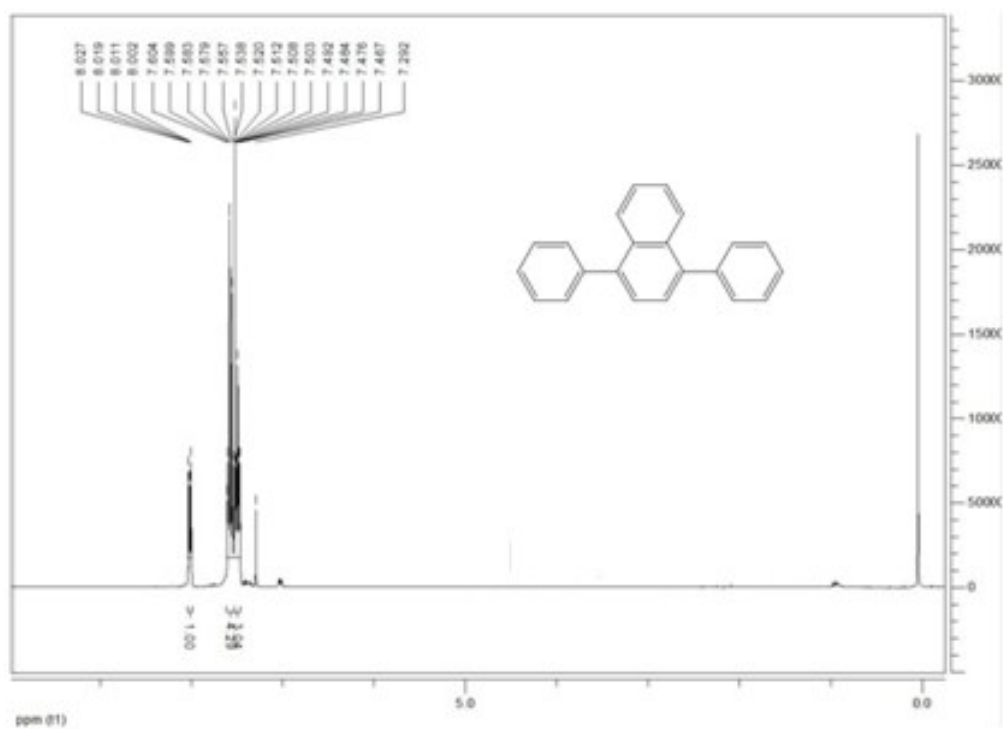

**Fig. S31** The  $^1\text{H}$  NMR (400 MHz,  $\text{CDCl}_3$ ) spectra of 1,4-diphenylnaphthalene.

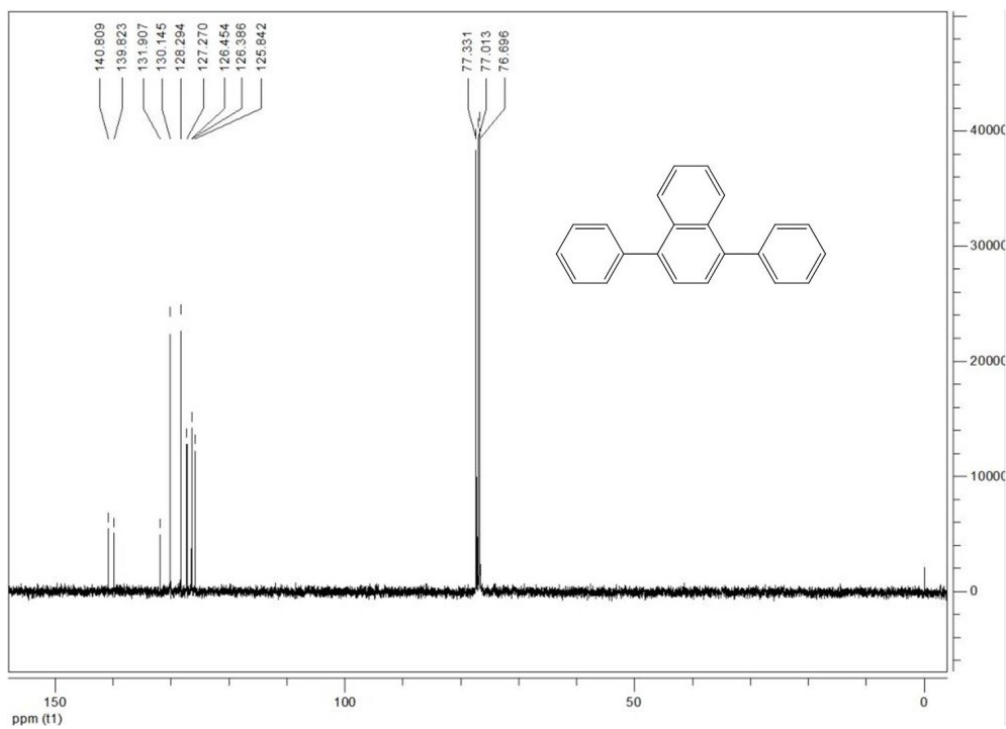

**Fig. S32** The <sup>13</sup>C NMR (100 MHz, CDCl<sub>3</sub>) spectra of 1,4-diphenylnaphthalene.

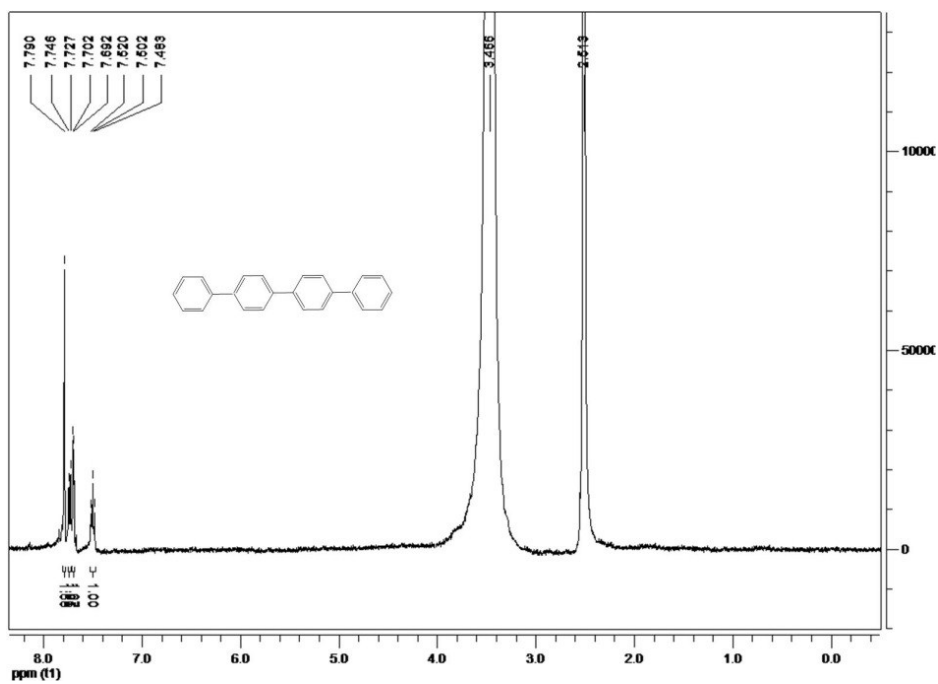

**Fig. S33** The <sup>1</sup>H NMR (400 MHz, DMSO-*d*<sub>6</sub>) of 4, 4'-diphenylbiphenyl.

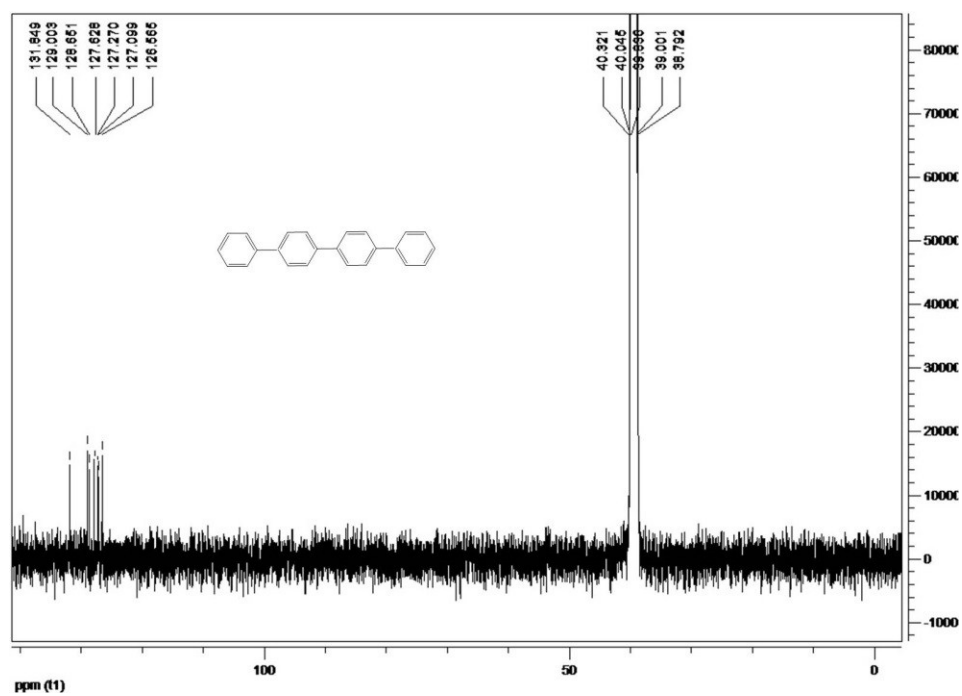

Fig. S34 The  $^{13}\text{C}$  NMR (100 MHz,  $\text{DMSO}-d_6$ ) spectra of 4, 4'-diphenylbiphenyl.

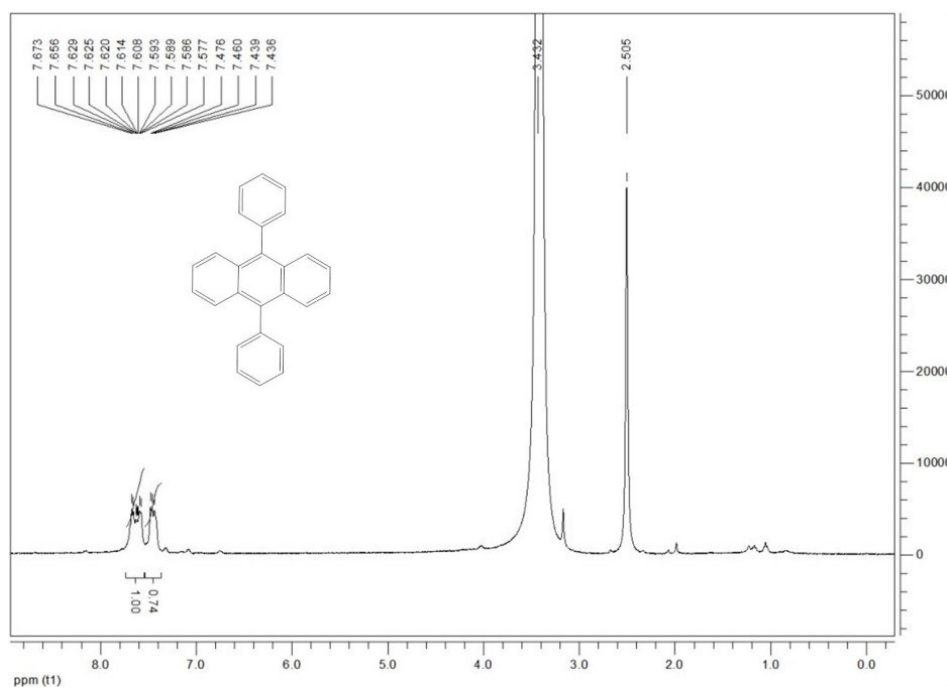

Fig. S35 The  $^1\text{H}$  NMR (400 MHz,  $\text{DMSO}-d_6$ ) spectra of 9,10-diphenylanthracene.



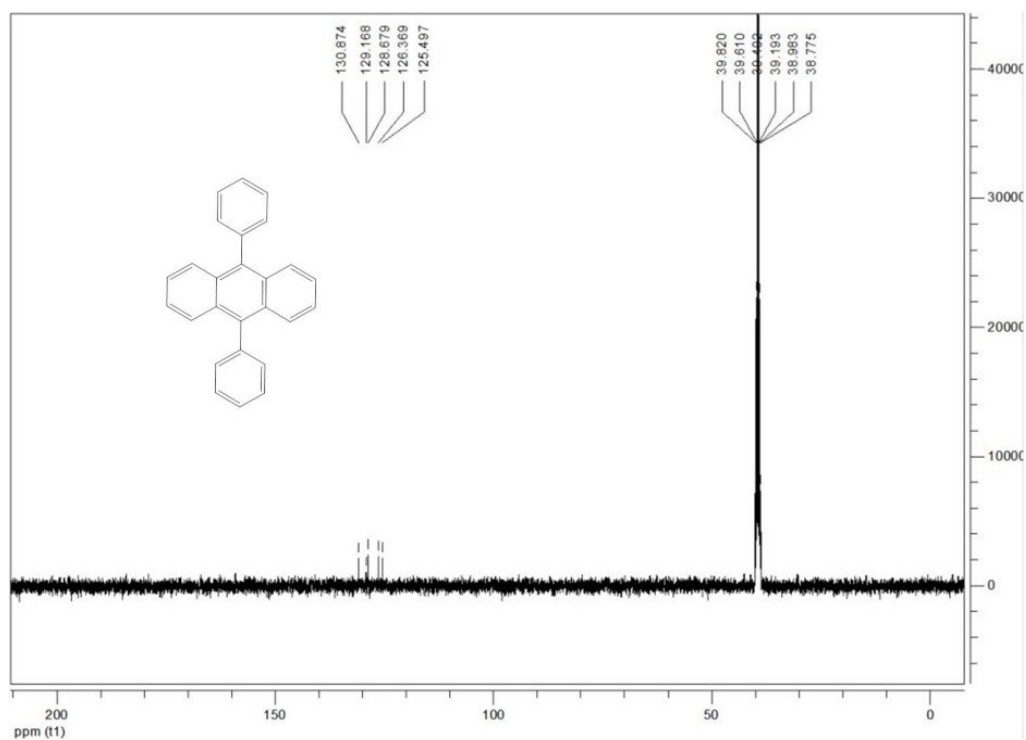

**Fig. S36** The  $^{13}\text{C}$  NMR (100 MHz,  $\text{DMSO-}d_6$ ) spectra of 9,10-diphenylanthracene.

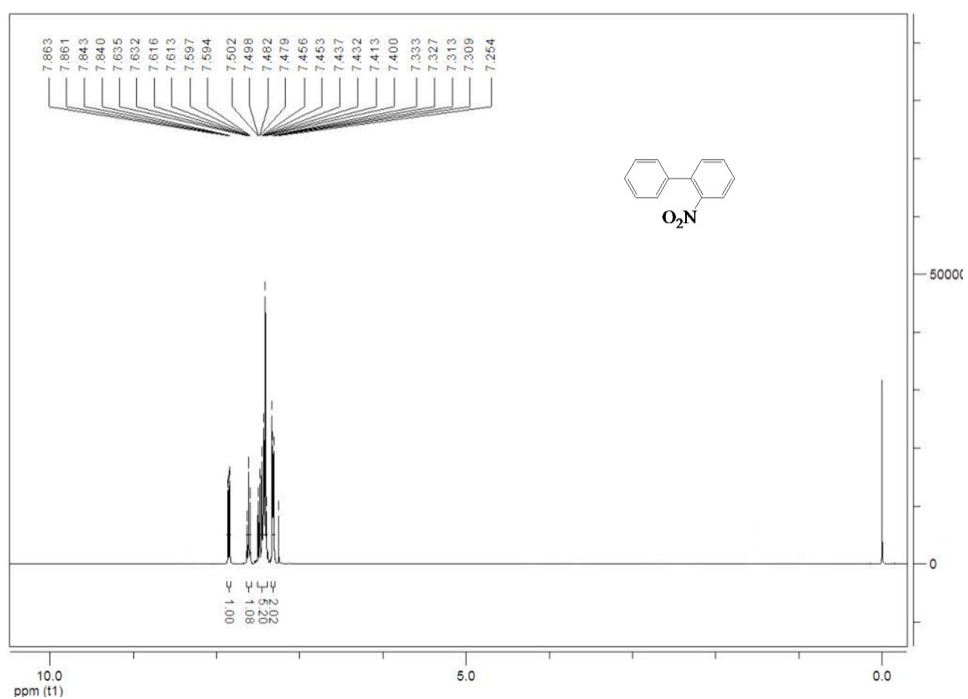

**Fig. S37** The  $^1\text{H}$  NMR (400 MHz,  $\text{CDCl}_3$ ) spectra of 2-nitrophenyl.

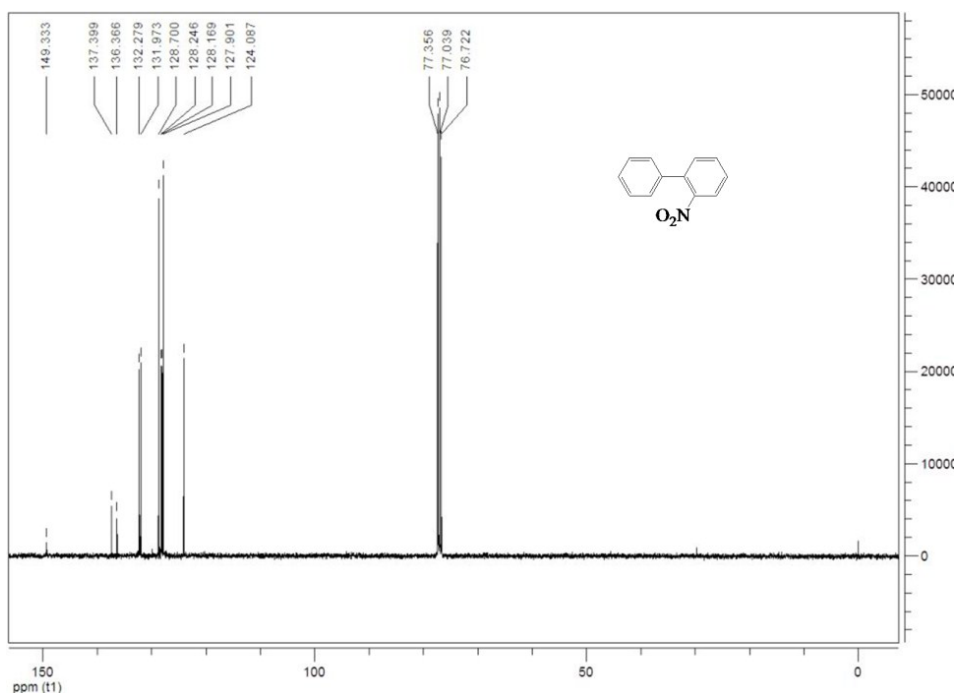

**Fig. S38** The  $^{13}\text{C}$  NMR (100 MHz,  $\text{CDCl}_3$ ) spectra of 2-nitrobiphenyl.

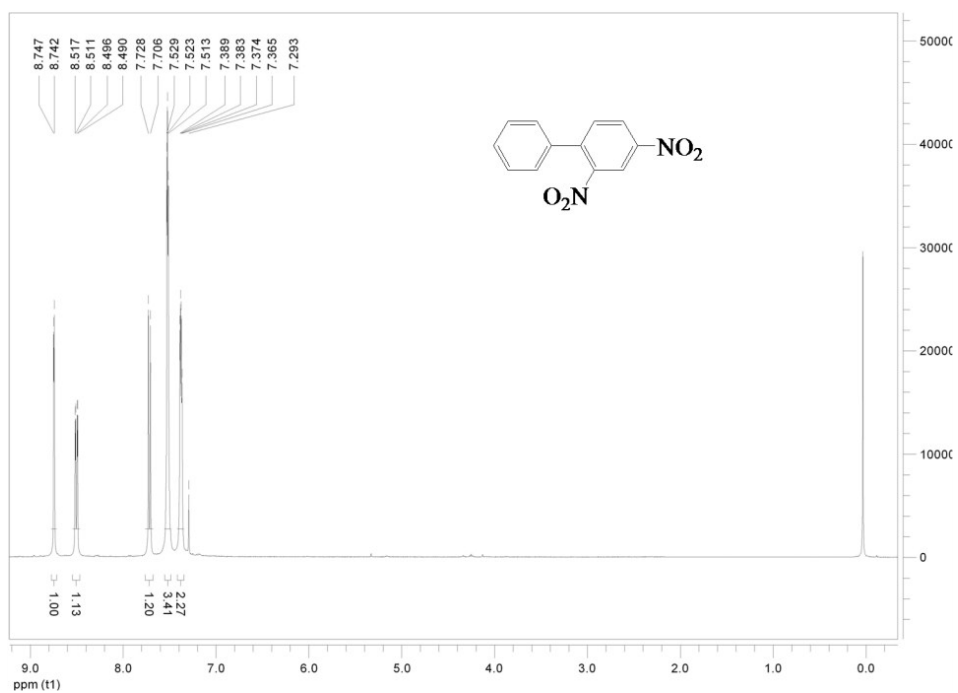

**Fig. S39** The  $^1\text{H}$  NMR (400 MHz,  $\text{CDCl}_3$ ) spectra of 2,4-dinitrobiphenyl.

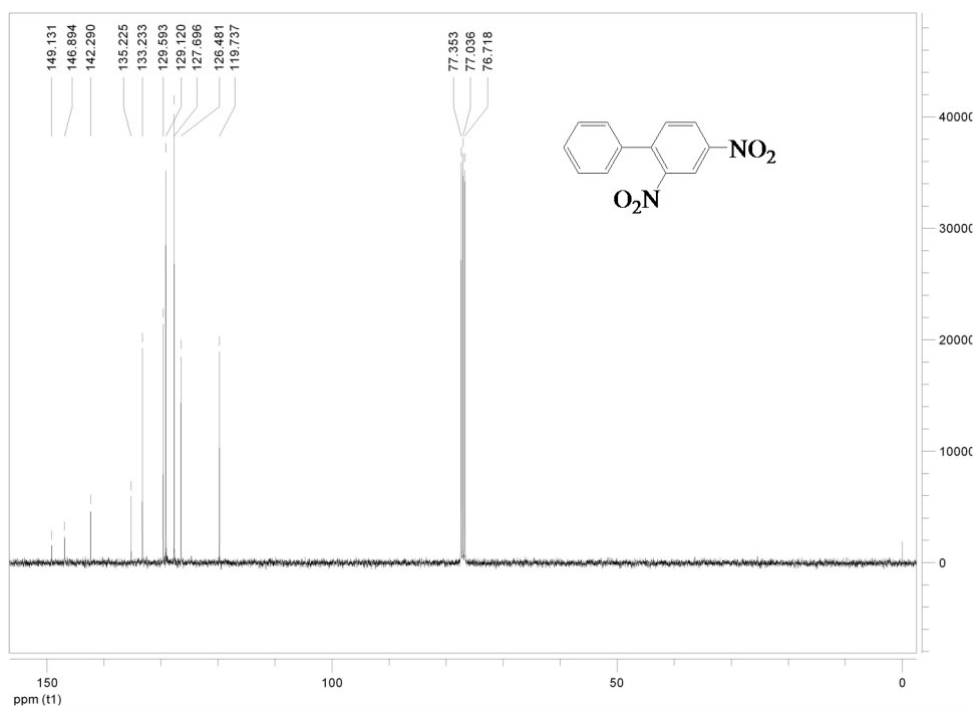

**Fig. S40** The  $^{13}\text{C}$  NMR (100 MHz,  $\text{CDCl}_3$ ) spectra of 2,4-dinitrobiphenyl.

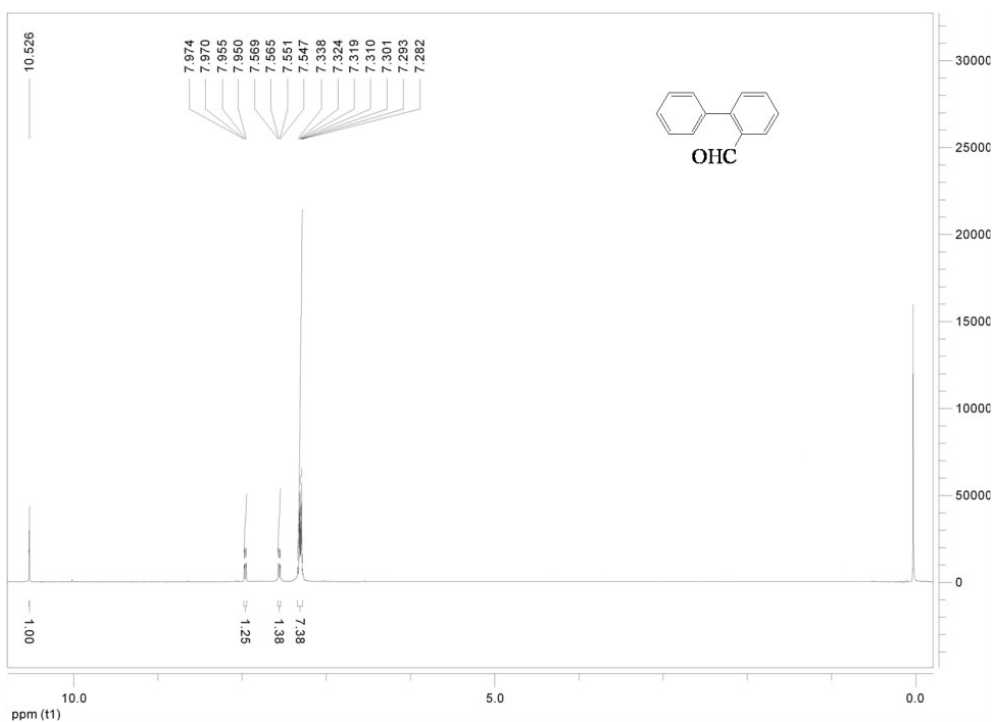

**Fig. S41** The  $^1\text{H}$  NMR (400 MHz,  $\text{CDCl}_3$ ) spectra of biphenyl-2-carbaldehyde.

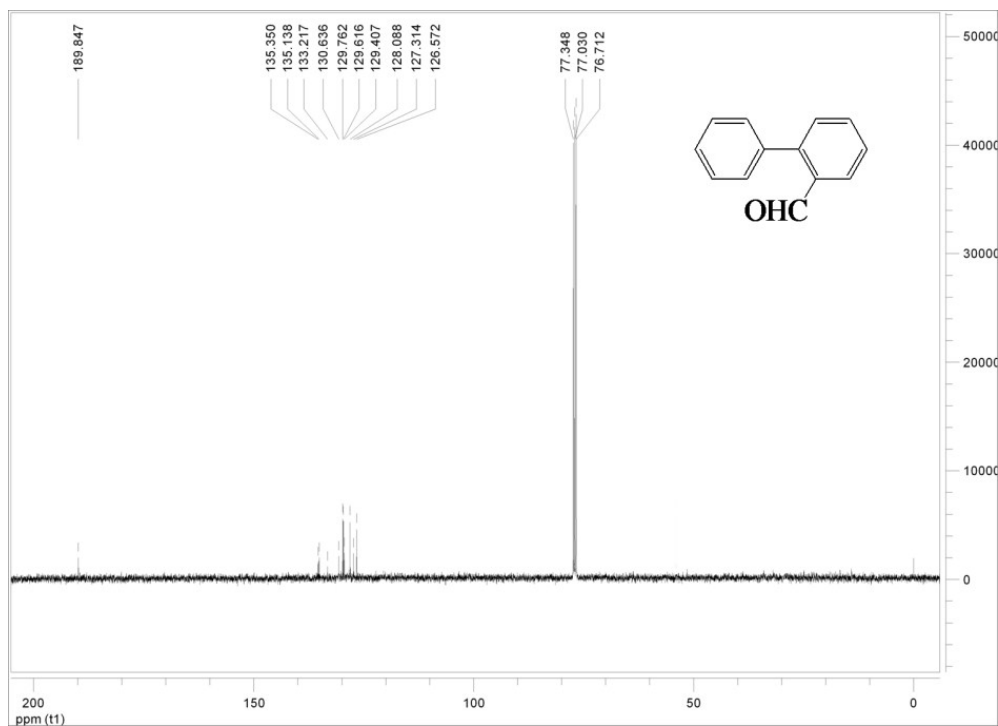

**Fig. S42** The  $^{13}\text{C}$  NMR (100 MHz,  $\text{CDCl}_3$ ) spectra of biphenyl-2-carbaldehyde.

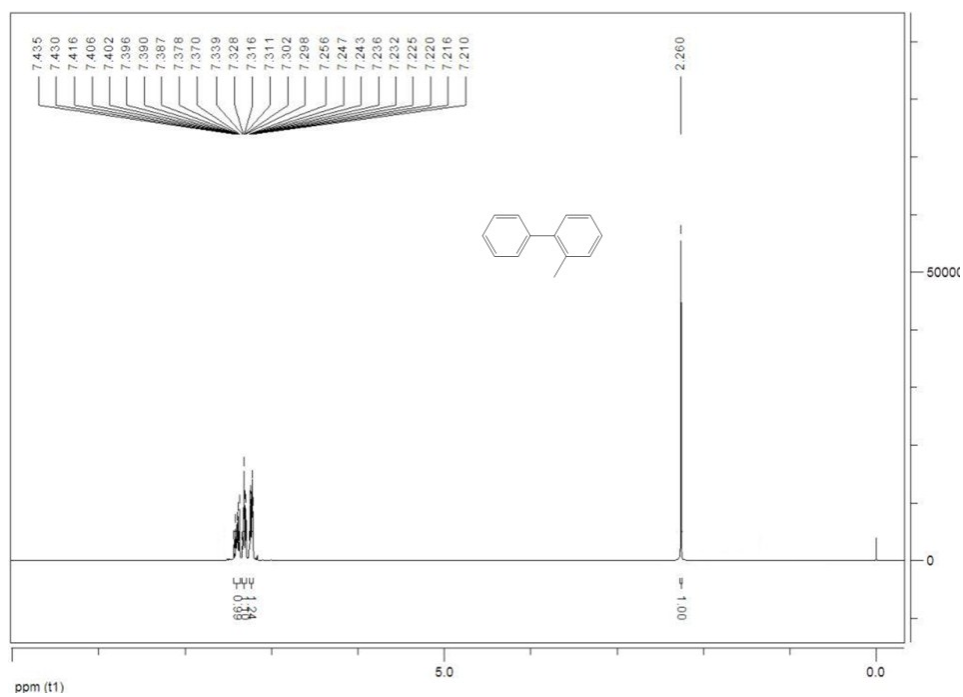

**Fig. S43** The  $^1\text{H}$  NMR (400 MHz,  $\text{CDCl}_3$ ) spectra of 2-methylbiphenyl.

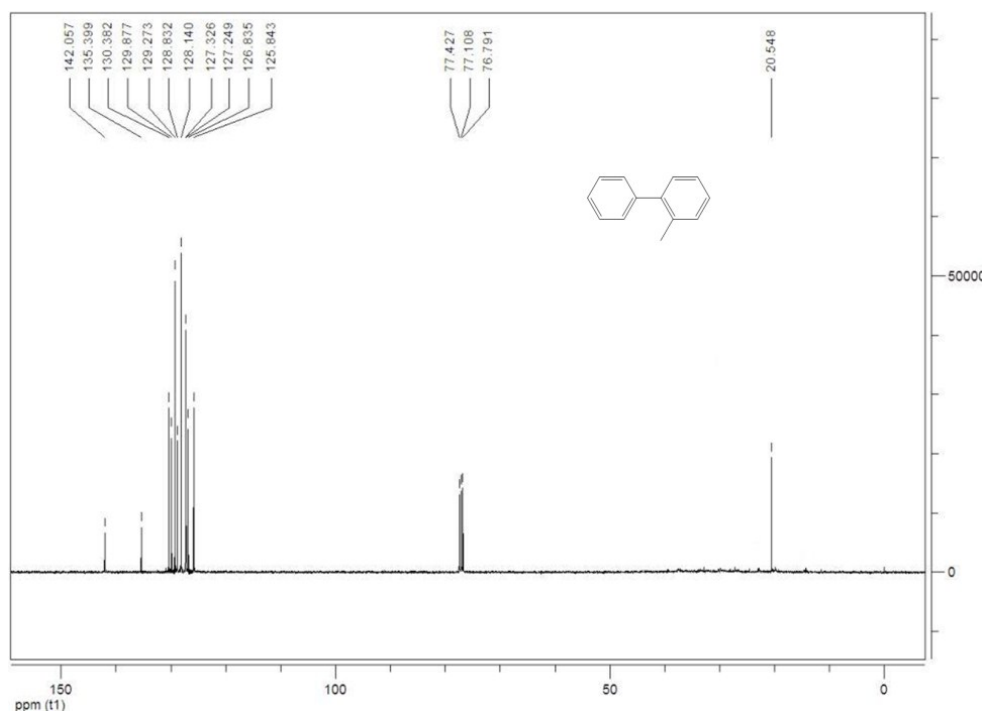

**Fig. S44** The  $^{13}\text{C}$  NMR (100 MHz,  $\text{CDCl}_3$ ) spectra of 2-methylbiphenyl.

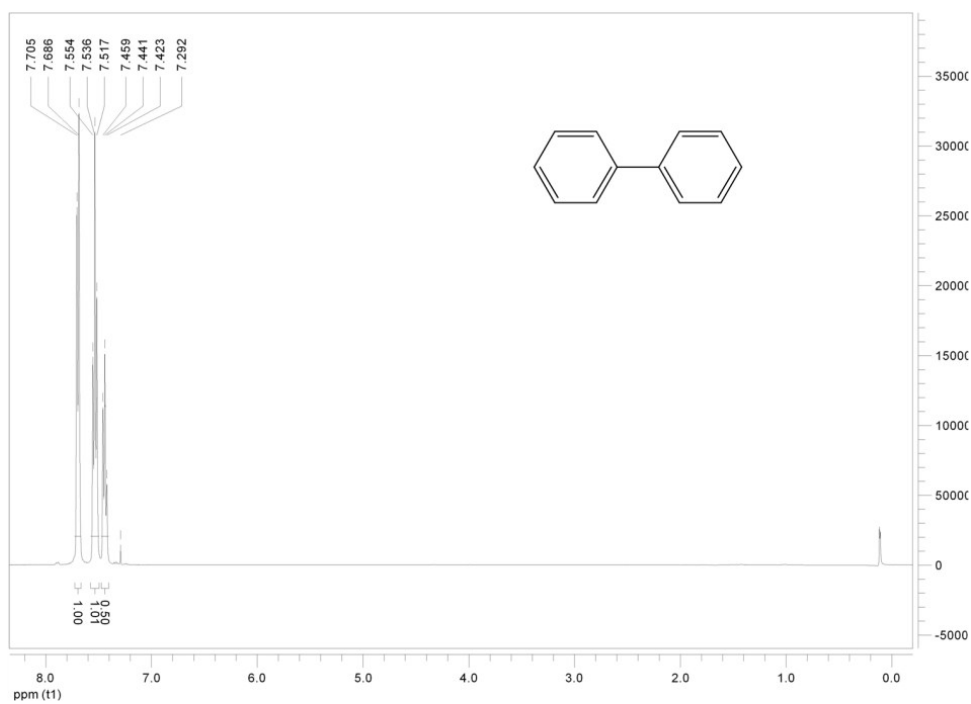

**Fig. S45** The  $^1\text{H}$  NMR (400 MHz,  $\text{CDCl}_3$ ) spectra of biphenyl.



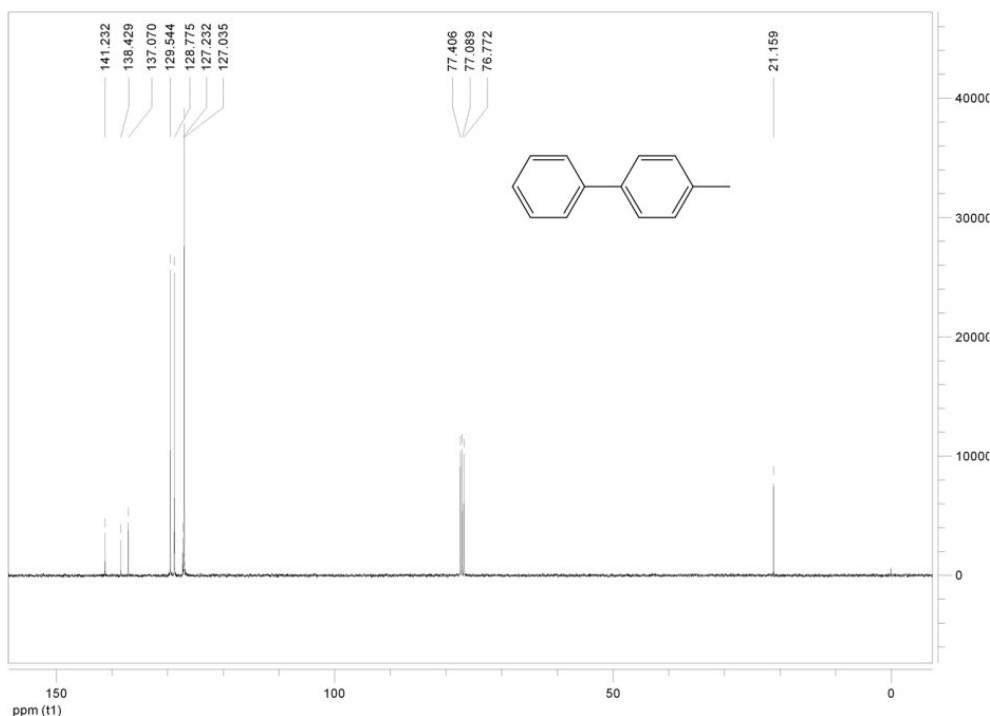

**Fig. S48** The  $^{13}\text{C}$  NMR (100 MHz,  $\text{CDCl}_3$ ) spectra of 4-methylbiphenyl.

## References

- 1 E. Shirakawa, Y. Hayashi, K. Itoh, R. Watabe, N. Uchiyama, W. Konagaya, S. Masui and T. Hayashi, *Angew. Chem., Int. Ed.*, 2012, **51**, 218-221.
- 2 M. Jin and D. Lee, *Angew. Chem., Int. Ed.*, 2010, **49**, 1119-1122.
- 3 R. J. Lundgren, B. D. Peters, P. G. Alsabeh and M. Stradiotto, *Angew. Chem.*, 2010, **122**, 4165-4168.
- 4 K. Dhara, K. Sarkar, D. Srimani, S. K. Saha, P. Chattopadhyay and A. Bhaumik, *Dalton Trans.*, 2010, **39**, 6395-6402.
- 5 C. C. Price, H. M. Shafer, M. F. Huber and C. Bernstein, *J. Org. Chem.*, 1942, **7**, 517.
- 6 S. K. Taylor, S. G. Bennett, K. J. Heinz and L. K. Lashley, *J. Org. Chem.*, 1981, **46**, 2194.
- 7 C. F. Koelsch, *J. Org. Chem.*, 1938, **3**, 456.
- 8 M. Planellas, R. Pleixats and A. Shafir, *Adv. Synth. Catal.*, 2012, **354**, 651-662.
